# Supplementary material for: An efficient approach toward formation of polycyclic coumarin derivatives via carbocation-initiated [4+2] cycloaddition and atom-economical photo-irradiated cyclization
Source: Royal Society of Chemistry journal article supplement (doi:10.1039/c6cc05698a), 2016-01-01

## Supporting Information

### **An Efficient Approach toward Formation of Polycyclic Coumarin Derivatives via Carbocation-initiated [4 + 2] Cycloaddition and Atom-Economic Photo-irradiated Cyclization**

*Ling Chen,<sup>[a]</sup> Yu-Ming Cui,<sup>[a]</sup> Zheng Xu,<sup>[a]</sup> Jian Cao,<sup>\*,[a]</sup> Zhan-Jiang Zheng,<sup>[a]</sup> and  
Li-Wen Xu<sup>\*,[a, b]</sup>*

[a] Key Laboratory of Organosilicon Chemistry and Material Technology of Ministry of Education, Hangzhou Normal University, No 1378, Wenyi West Road, Science Park of HZNU, Hangzhou 311121, People's Republic of China

[b] State Key Laboratory for Oxo Synthesis and Selective Oxidation, Lanzhou Institute of Chemical Physics (LICP), Chinese Academy of Sciences (CAS), P. R. China

| <b>Table of Contents</b>                                                          |         |
|-----------------------------------------------------------------------------------|---------|
| General experimental procedures                                                   | S2      |
| Synthesis of 4-vinylcoumarins <b>3</b>                                            | S2-S9   |
| Synthesis of polycyclic coumarin derivatives <b>4</b>                             | S9-S14  |
| NMR spectra of new compounds                                                      | S15-S42 |
| Fluorescent spectra of <b>3a</b> and <b>4a</b>                                    | S43-S45 |
| Frontier orbital energy (in eV) calculated at B3LYP/6-31G(d,p)<br>level of theory | S46     |
| ORTEP representation of <b>4a</b>                                                 | S47     |

## General experimental procedures

**General:**  $^1\text{H}$  NMR (400 MHz) and  $^{13}\text{C}$  NMR (100 MHz) spectra were recorded on a Bruker Avance (400 MHz) spectrometer, using  $\text{CDCl}_3$  as the solvent and TMS as internal standard; chemical shifts were quoted in parts per million and  $J$  values were given in hertz. High resolution mass spectrometry (HRMS) was performed on a Waters Micromass GCT instrument. Melting points were uncorrected. All solvents were dried according to standard procedures. Ynamides **2**<sup>1</sup> and propargylic silyl ether **1**<sup>2</sup> were prepared by reported methods.

1. X. Zhang, Y. Zhang, J. Huang, R.-P. Hsung, K. C. M. Kurtz, J. Oppenheimer, M. E. Petersen, I. K. Sagamanova, L. Shen and M. R. Tracey, *J. Org. Chem.*, **2006**, *71*, 4170.
2. T. Ishikawa, S. Manabe, T. Aikawa, T. Kudo and S. Saito, *Org. Lett.*, **2004**, *6*, 2361.

## Typical procedure for the synthesis of 4-(2,2-diphenylvinyl)-3-phenyl-2H-chromen-2-one **3**

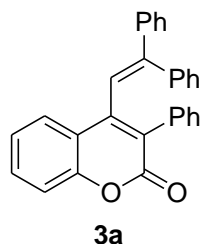

### 4-(2,2-diphenylvinyl)-3-phenyl-2H-chromen-2-one **3a**

A vial was charged with and  $\text{ZnBr}_2$  (67.6 mg, 0.3 mmol), propargyl silyl ether **1b** (116.0 mg, 0.3 mmol) and ynamide **2c** (56.2 mg, 0.3 mmol) and evacuated under high vacuum and backfilled with  $\text{N}_2$ .  $\text{CH}_2\text{Cl}_2$  (3 mL) was next added and the solution was stirred at rt. Upon reaction completion (8 h, TLC, eluent: hexane-EtOAc, 15:1), the mixture was filtered over a plug of silica gel (washed with 50 mL EtOAc), and the filtrate was concentrated. The residue was purified by flash chromatography on silica gel (eluent: hexane/ethyl acetate = 15:1) to afford **3a** (88.9 mg, 74%) as a colorless solid, mp 182-184 °C.  $^1\text{H}$  NMR (400 MHz,  $\text{CDCl}_3$ ):  $\delta$  7.73-7.75 (m, 1H), 7.49-7.53 (m, 1H), 7.19-7.31 (m, 11H), 6.99-7.04 (m, 4H), 6.70 (s, 1H), 6.57 (d,  $J = 7.2$  Hz, 2H);  $^{13}\text{C}$  NMR (100 MHz,  $\text{CDCl}_3$ ):  $\delta$  161.1, 152.8, 148.4, 148.0, 142.0, 138.5, 134.0, 131.3, 130.4, 129.5, 128.4, 128.3, 128.1, 128.0, 127.65, 127.61, 126.7, 126.5, 124.2, 120.8, 120.4, 116.8. HRMS (ESI-TOF)  $m/z$ :  $[\text{M} + \text{H}]^+$  Calcd for  $\text{C}_{29}\text{H}_{21}\text{O}_2$ , 401.1536; found

401.1537.

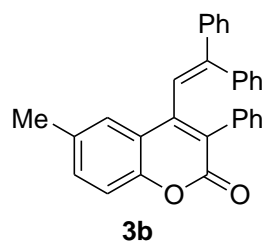

**4-(2,2-diphenylvinyl)-6-methyl-3-phenyl-2H-chromen-2-one 3b**

Colorless solid (141.0 mg, 68%), mp 199-201 °C. <sup>1</sup>H NMR (400 MHz, CDCl<sub>3</sub>): δ 7.42 (s, 1H), 7.05-7.22 (m, 11H), 6.87-6.94 (m, 4H), 6.60 (s, 1H), 6.46 (d, *J* = 7.6 Hz, 2H), 2.25 (s, 3H); <sup>13</sup>C NMR (100 MHz, CDCl<sub>3</sub>): δ 161.4, 151.0, 148.3, 148.0, 142.1, 138.6, 134.1, 133.9, 132.4, 130.5, 129.5, 128.5, 128.4, 128.3, 128.1, 128.0, 127.6, 127.5, 126.4, 126.3, 121.0, 120.1, 116.5, 21.0. HRMS (ESI-TOF) *m/z*: [M + Na]<sup>+</sup> Calcd for C<sub>30</sub>H<sub>22</sub>NaO<sub>2</sub>, 437.1512; found 437.1517.

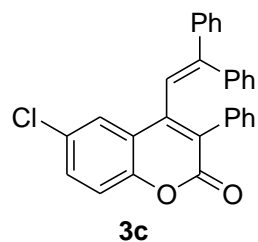

**6-chloro-4-(2,2-diphenylvinyl)-3-phenyl-2H-chromen-2-one 3c**

Yellow oil (97.8 mg, 75%). <sup>1</sup>H NMR (400 MHz, CDCl<sub>3</sub>): δ 7.68 (d, *J* = 2.4 Hz, 1H), 7.42-7.46 (m, 1H), 7.18-7.34 (m, 10H), 7.00-7.06 (m, 4H), 6.63 (s, 1H), 6.60 (d, *J* = 7.2 Hz, 2H); <sup>13</sup>C NMR (100 MHz, CDCl<sub>3</sub>): δ 160.6, 151.2, 149.2, 146.9, 141.7, 138.4, 133.5, 131.2, 130.2, 129.6, 129.4, 128.7, 128.4, 128.3, 128.1, 127.9, 127.7, 127.4, 126.1, 121.4, 119.9, 118.2. HRMS (ESI-TOF) *m/z*: [M + Na]<sup>+</sup> Calcd for C<sub>29</sub>H<sub>19</sub>ClNaO<sub>2</sub>, 457.0966; found 457.0969.

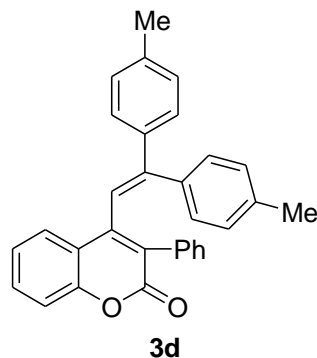

**4-(2,2-dip-tolylvinyl)-3-phenyl-2H-chromen-2-one 3d**

Yellow oil (83.5 mg, 65%).  $^1\text{H}$  NMR (400 MHz,  $\text{CDCl}_3$ ):  $\delta$  7.73 (d,  $J = 7.6$  Hz, 1H), 7.47-7.49 (m, 1H), 7.34 (d,  $J = 8.0$  Hz, 1H), 7.10-7.23 (m, 8H), 7.01 (d,  $J = 7.2$  Hz, 2H), 6.83 (d,  $J = 8.0$  Hz, 2H), 6.61 (s, 1H), 6.47 (d,  $J = 8.0$  Hz, 2H), 2.34 (s, 3H), 2.25 (s, 3H);  $^{13}\text{C}$  NMR (100 MHz,  $\text{CDCl}_3$ ):  $\delta$  161.3, 152.8, 148.43, 148.40, 139.4, 138.4, 137.9, 135.8, 134.1, 131.3, 130.4, 129.5, 129.0, 128.6, 128.3, 127.6, 126.8, 126.3, 124.2, 120.5, 119.6, 116.7, 21.25, 21.23. HRMS (ESI-TOF)  $m/z$ :  $[\text{M} + \text{Na}]^+$  Calcd for  $\text{C}_{31}\text{H}_{24}\text{NaO}_2$ , 451.1669; found 451.1666.

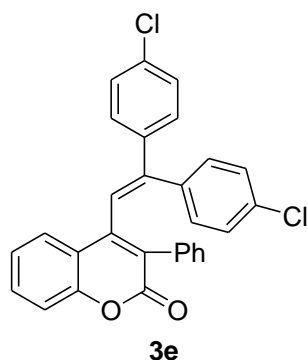

#### 4-(2,2-bis(4-chlorophenyl)vinyl)-3-phenyl-2H-chromen-2-one **3e**

Yellow oil (83.1 mg, 59%).  $^1\text{H}$  NMR (400 MHz,  $\text{CDCl}_3$ ):  $\delta$  7.70-7.72 (m, 1H), 7.53-7.55 (m, 1H), 7.38 (d,  $J = 8.4$  Hz, 1H), 7.19-7.29 (m, 6H), 7.11 (d,  $J = 8.4$  Hz, 2H), 6.98-7.03 (m, 4H), 6.72 (s, 1H), 6.44 (d,  $J = 8.4$  Hz, 2H);  $^{13}\text{C}$  NMR (100 MHz,  $\text{CDCl}_3$ ):  $\delta$  160.9, 152.8, 147.2, 146.1, 139.9, 136.5, 134.8, 134.4, 133.7, 131.6, 130.6, 130.3, 129.5, 128.7, 128.4, 127.8, 127.7, 126.5, 126.3, 124.4, 121.6, 120.2, 116.9. HRMS (ESI-TOF)  $m/z$ :  $[\text{M} + \text{Na}]^+$  Calcd for  $\text{C}_{29}\text{H}_{18}\text{Cl}_2\text{NaO}_2$ , 491.0576; found 491.0566.

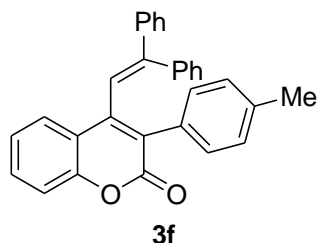

#### 4-(2,2-diphenylvinyl)-3-*p*-tolyl-2H-chromen-2-one **3f**

Colorless solid (89.5 mg, 72%), mp 185-187 °C.  $^1\text{H}$  NMR (400 MHz,  $\text{CDCl}_3$ ):  $\delta$  7.70-7.72 (m, 1H), 7.46-7.50 (m, 1H), 7.20-7.34 (m, 8H), 7.01-7.05 (m, 4H), 6.93 (d,  $J = 8.0$  Hz, 2H), 6.70 (s, 1H), 6.62 (d,  $J = 7.2$  Hz, 2H), 2.28 (s, 3H);  $^{13}\text{C}$  NMR (100 MHz,  $\text{CDCl}_3$ ):  $\delta$  161.2, 152.8, 148.2, 147.5, 142.1, 138.6, 137.4, 131.1, 131.0, 130.2,

129.4, 128.38, 128.36, 128.35, 128.32, 128.1, 127.9, 126.7, 126.6, 124.1, 121.0, 120.2, 116.7, 21.3. HRMS (ESI-TOF)  $m/z$ :  $[M + Na]^+$  Calcd for  $C_{30}H_{22}NaO_2$ , 437.1512; found 437.1513.

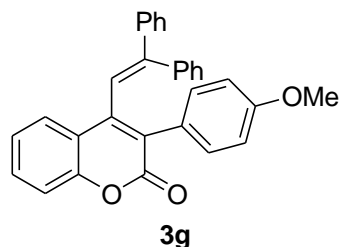

#### 4-(2,2-diphenylvinyl)-3-(4-methoxyphenyl)-2H-chromen-2-one **3g**

Colorless solid (107.2 mg, 83%), mp 192-194 °C.  $^1H$  NMR (400 MHz,  $CDCl_3$ ):  $\delta$  7.72 (d,  $J = 7.2$  Hz, 1H), 7.48-7.49 (m, 1H), 7.15-7.34 (m, 8H), 6.96-7.05 (m, 4H), 6.76 (d,  $J = 8.0$  Hz, 2H), 6.71 (s, 1H), 6.62 (d,  $J = 8.0$  Hz, 2H), 3.75 (s, 3H);  $^{13}C$  NMR (100 MHz,  $CDCl_3$ ):  $\delta$  161.4, 159.1, 152.7, 148.1, 147.3, 142.0, 138.6, 131.7, 131.1, 129.4, 128.4, 128.3, 128.1, 127.9, 126.6, 126.3, 126.1, 124.2, 121.0, 120.4, 116.7, 113.2, 55.2. HRMS (ESI-TOF)  $m/z$ :  $[M + H]^+$  Calcd for  $C_{30}H_{22}O_3$ , 431.1642; found 431.1655.

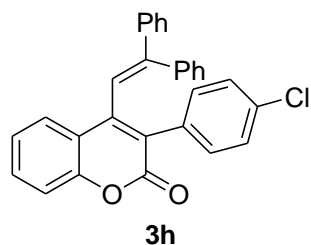

#### 3-(4-chlorophenyl)-4-(2,2-diphenylvinyl)-2H-chromen-2-one **3h**

Colorless solid (84.1 mg, 64%), mp 207-209 °C.  $^1H$  NMR (400 MHz,  $CDCl_3$ ):  $\delta$  7.76 (d,  $J = 8.0$  Hz, 1H), 7.51-7.55 (m, 1H), 7.14-7.37 (m, 10H), 7.02-7.06 (m, 2H), 6.89-6.91 (m, 2H), 6.71 (s, 1H), 6.57 (d,  $J = 7.6$  Hz, 2H);  $^{13}C$  NMR (100 MHz,  $CDCl_3$ ):  $\delta$  160.9, 152.8, 148.9, 148.2, 141.8, 138.4, 133.6, 132.4, 131.8, 131.7, 129.4, 128.7, 128.5, 128.3, 128.2, 128.1, 127.8, 126.6, 125.1, 124.4, 120.3, 116.8. HRMS (ESI-TOF)  $m/z$ :  $[M + Na]^+$  Calcd for  $C_{29}H_{19}ClNaO_2$ , 457.0966; found 457.0968.

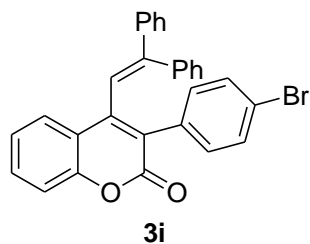

**3-(4-bromophenyl)-4-(2,2-diphenylvinyl)-2H-chromen-2-one 3i**

Colorless solid (85.5 mg, 59%), mp 199-201 °C. <sup>1</sup>H NMR (400 MHz, CDCl<sub>3</sub>): δ 7.75-7.77 (m, 1H), 7.52-7.54 (m, 1H), 7.20-7.37 (m, 10H), 7.03-7.07 (m, 2H), 6.84 (d, *J* = 8.4 Hz, 2H), 6.71 (s, 1H), 6.57 (d, *J* = 7.2 Hz, 2H); <sup>13</sup>C NMR (100 MHz, CDCl<sub>3</sub>): δ 160.8, 152.8, 149.0, 148.1, 141.8, 138.3, 132.9, 132.0, 131.6, 130.8, 129.4, 128.7, 128.4, 128.33, 128.27, 128.1, 126.6, 125.1, 124.4, 121.9, 120.30, 120.27, 116.9. HRMS (ESI-TOF) *m/z*: [M + Na]<sup>+</sup> Calcd for C<sub>29</sub>H<sub>19</sub>BrNaO<sub>2</sub>, 501.0461; found 501.0482.

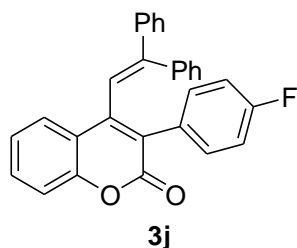

**4-(2,2-diphenylvinyl)-3-(4-fluorophenyl)-2H-chromen-2-one 3j**

Colorless solid (87.9 mg, 70%), mp 203-205 °C. <sup>1</sup>H NMR (400 MHz, CDCl<sub>3</sub>): δ 7.76 (d, *J* = 8.0 Hz, 1H), 7.52-7.54 (m, 1H), 7.17-7.37 (m, 8H), 7.02-7.06 (m, 2H), 6.88-6.94 (m, 4H), 6.71 (d, *J* = 1.6 Hz, 1H), 6.58 (d, *J* = 7.6 Hz, 2H); <sup>13</sup>C NMR (100 MHz, CDCl<sub>3</sub>): δ 162.2 (d, *J* = 246 Hz), 161.1, 152.8, 148.7, 148.1, 141.9, 138.4, 132.2 (d, *J* = 9 Hz), 131.5, 129.9 (d, *J* = 3 Hz), 129.4, 128.6, 128.4, 128.3, 128.2, 128.0, 126.6, 125.3, 124.4, 120.5, 120.4, 116.8, 114.6 (d, *J* = 21 Hz). HRMS (ESI-TOF) *m/z*: [M + Na]<sup>+</sup> Calcd for C<sub>29</sub>H<sub>19</sub>FNao<sub>2</sub>, 441.1261 found 441.1270.

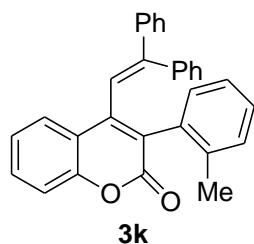

**4-(2,2-diphenylvinyl)-3-o-tolyl-2H-chromen-2-one 3k**

Colorless solid (100.7 mg, 81%), mp 218-220 °C.  $^1\text{H}$  NMR (400 MHz,  $\text{CDCl}_3$ ):  $\delta$  7.74 (d,  $J = 7.6$  Hz, 1H), 7.49-7.51 (m, 1H), 7.37 (d,  $J = 8.4$  Hz, 1H), 7.05-7.30 (m, 13H), 6.59-6.66 (m, 3H), 1.59 (s, 3H);  $^{13}\text{C}$  NMR (100 MHz,  $\text{CDCl}_3$ ):  $\delta$  160.4, 153.0, 149.0, 148.4, 142.3, 138.8, 133.7, 131.4, 130.6, 130.0, 129.8, 128.4, 128.33, 128.30, 128.14, 128.09, 126.9, 126.8, 125.2, 124.3, 120.7, 120.3, 116.9, 19.3. HRMS (ESI-TOF)  $m/z$ :  $[\text{M} + \text{H}]^+$  Calcd for  $\text{C}_{30}\text{H}_{23}\text{O}_2$ , 415.1693 found 415.1685.

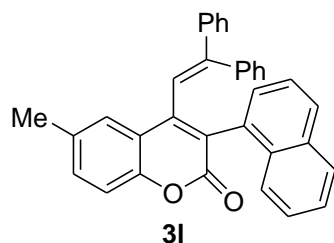

**4-(2,2-diphenylvinyl)-6-methyl-3-(naphthalen-1-yl)-2H-chromen-2-one 3l**

Colorless solid (159.6 mg, 69%), mp 202-204 °C.  $^1\text{H}$  NMR (400 MHz,  $\text{CDCl}_3$ ):  $\delta$  7.67 (d,  $J = 6.8$  Hz, 1H), 7.59 (d,  $J = 8.4$  Hz, 1H), 7.45 (s, 1H), 6.40-7.31 (m, 18H), 2.27 (s, 3H);  $^{13}\text{C}$  NMR (100 MHz,  $\text{CDCl}_3$ ):  $\delta$  161.4, 151.3, 150.2, 148.0, 142.1, 138.7, 134.1, 133.5, 132.7, 131.6, 131.3, 129.6, 128.7, 128.42, 128.38, 128.2, 128.1, 127.8, 126.7, 126.2, 125.4, 125.3, 124.9, 121.3, 120.1, 116.7, 21.0. HRMS (ESI-TOF)  $m/z$ :  $[\text{M} + \text{Na}]^+$  Calcd for  $\text{C}_{34}\text{H}_{24}\text{NaO}_2$ , 487.1669 found 487.1664.

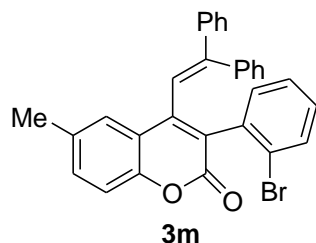

**3-(2-bromophenyl)-4-(2,2-diphenylvinyl)-6-methyl-2H-chromen-2-one 3m**

Colorless solid (81.4 mg, 55%), mp 162-164 °C.  $^1\text{H}$  NMR (400 MHz,  $\text{CDCl}_3$ ):  $\delta$  7.44-7.45 (m, 2H), 7.11-7.24 (m, 8H), 6.94-7.01 (m, 4H), 6.10-6.66 (m, 4H), 2.27 (s, 3H);  $^{13}\text{C}$  NMR (100 MHz,  $\text{CDCl}_3$ ):  $\delta$  160.7, 151.2, 149.8, 148.1, 142.1, 138.6, 135.1, 134.2, 132.9, 132.4, 132.1, 130.0, 129.3, 128.7, 128.5, 128.4, 128.1, 127.2, 126.7, 125.3, 123.5, 120.6, 119.7, 116.7, 21.0. HRMS (ESI-TOF)  $m/z$ :  $[\text{M} + \text{Na}]^+$  Calcd for  $\text{C}_{30}\text{H}_{21}\text{BrNaO}_2$ , 515.0617 found 515.0618.

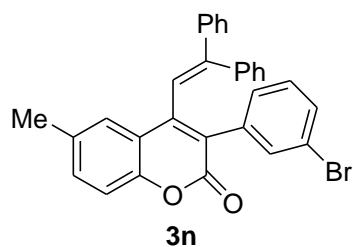

**3-(3-bromophenyl)-4-(2,2-diphenylvinyl)-6-methyl-2H-chromen-2-one 3n**

Colorless solid (93.2 mg, 63%), mp 175-177 °C.  $^1\text{H}$  NMR (400 MHz,  $\text{CDCl}_3$ ):  $\delta$  7.57 (s, 1H), 7.20-7.35 (m, 9H), 7.03-7.09 (m, 3H), 6.97 (s, 1H), 6.89 (d,  $J = 7.6$  Hz, 1H), 6.70 (s, 1H), 6.51 (d,  $J = 7.2$  Hz, 2H), 2.40 (s, 3H);  $^{13}\text{C}$  NMR (100 MHz,  $\text{CDCl}_3$ ):  $\delta$  160.9, 150.9, 149.0, 148.7, 141.9, 138.2, 136.1, 134.3, 133.4, 132.8, 130.5, 129.4, 129.1, 128.9, 128.6, 128.5, 128.4, 128.3, 128.1, 126.3, 124.7, 121.4, 120.4, 120.2, 116.6, 21.0. HRMS (ESI-TOF)  $m/z$ :  $[\text{M} + \text{Na}]^+$  Calcd for  $\text{C}_{30}\text{H}_{21}\text{BrNaO}_2$ , 515.0617 found 515.0632.

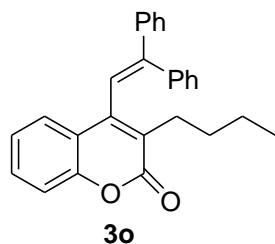

**3-butyl-4-(2,2-diphenylvinyl)-2H-chromen-2-one 3o**

Yellow oil (63.4 mg, 56%).  $^1\text{H}$  NMR (400 MHz,  $\text{CDCl}_3$ ):  $\delta$  7.58-7.60 (m, 1H), 7.37-7.42 (m, 6H), 7.25-7.27 (m, 1H), 7.11-7.17 (m, 4H), 7.04 (d,  $J = 8.0$  Hz, 2H), 6.75 (s, 1H), 2.46 (t,  $J = 7.6$  Hz, 2H), 1.12-1.55 (m, 4H), 0.86 (t,  $J = 7.6$  Hz, 3H);  $^{13}\text{C}$  NMR (100 MHz,  $\text{CDCl}_3$ ):  $\delta$  161.7, 152.4, 148.3, 146.7, 141.9, 138.8, 130.4, 129.4, 128.6, 128.5, 128.4, 128.2, 127.0, 126.4, 123.9, 120.7, 119.9, 116.6, 29.8, 28.6, 23.0, 13.9. HRMS (ESI-TOF)  $m/z$ :  $[\text{M} + \text{H}]^+$  Calcd for  $\text{C}_{27}\text{H}_{25}\text{O}_2$ , 381.1849 found 381.1851.

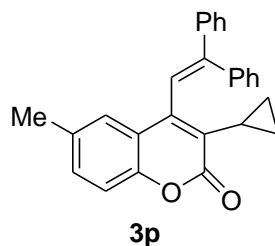

**3-cyclopropyl-4-(2,2-diphenylvinyl)-6-methyl-2H-chromen-2-one 3p**

Colorless solid (53.3 mg, 47%), mp 163-165 °C.  $^1\text{H}$  NMR (400 MHz,  $\text{CDCl}_3$ ):  $\delta$



7.33-7.38 (m, 6H), 7.05-7.12 (m, 5H), 6.96 (d,  $J = 7.2$  Hz, 2H), 6.78 (s, 1H), 2.25 (s, 3H), 1.18-1.24 (m, 1H), 1.00-1.05 (m, 1H), 0.77-0.79 (m, 1H), 0.62-0.64 (m, 2H);  $^{13}\text{C}$  NMR (100 MHz,  $\text{CDCl}_3$ ):  $\delta$  160.8, 150.2, 148.7, 147.5, 141.9, 139.2, 133.5, 131.3, 129.4, 128.6, 128.5, 128.4, 128.3, 128.2, 126.2, 125.6, 121.1, 119.8, 116.2, 21.0, 12.1, 7.7, 7.0. HRMS (ESI-TOF)  $m/z$ :  $[\text{M} + \text{Na}]^+$  Calcd for  $\text{C}_{27}\text{H}_{22}\text{NaO}_2$ , 401.1512 found 401.1517.

### Typical procedure for the synthesis of polycyclic coumarin derivatives 4

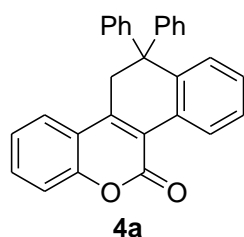

#### 12,12-diphenyl-11,12-dihydro-1,2-coumarin-5-one 4a

A solution of **3a** (50.0 mg, 0.125 mmol) in  $\text{CDCl}_3$  (1 mL) was irradiated using high pressure Hg lamp at rt for 12 h. The solvent was removed to give the pure product **4a** in quantitative yield as a colorless solid, mp 263-265 °C.  $^1\text{H}$  NMR (400 MHz,  $\text{CDCl}_3$ ):  $\delta$  8.60 (d,  $J = 8.0$  Hz, 1H), 7.78-7.80 (m, 1H), 7.37-7.47 (m, 2H), 7.18-7.27 (m, 9H), 7.03-7.06 (m, 4H), 6.85 (d,  $J = 8.0$  Hz, 1H), 3.84 (s, 2H);  $^{13}\text{C}$  NMR (100 MHz,  $\text{CDCl}_3$ ):  $\delta$  158.8, 152.9, 147.3, 144.5, 142.8, 131.4, 130.7, 128.8, 128.3, 128.1, 128.0, 127.2, 126.9, 124.4, 123.8, 119.9, 119.3, 116.9, 51.9, 37.0. HRMS (ESI-TOF)  $m/z$ :  $[\text{M} + \text{Na}]^+$  Calcd for  $\text{C}_{29}\text{H}_{20}\text{NaO}_2$ , 423.1356; found 423.1339.

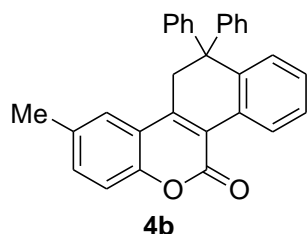

#### 9-methyl-12,12-diphenyl-11,12-dihydro-1,2-coumarin-5-one 4b

Colorless solid (50.0 mg, 100%), mp >250 °C.  $^1\text{H}$  NMR (400 MHz,  $\text{CDCl}_3$ ):  $\delta$  8.59 (d,  $J = 7.6$  Hz, 1H), 7.57 (s, 1H), 7.36-7.40 (m, 1H), 7.13-7.27 (m, 9H), 7.03-7.06 (m, 4H), 6.86 (d,  $J = 7.6$  Hz, 1H), 3.81 (s, 2H), 2.41 (s, 3H);  $^{13}\text{C}$  NMR (100 MHz,  $\text{CDCl}_3$ ):  $\delta$  159.0, 151.1, 147.3, 144.5, 142.7, 134.0, 132.6, 130.8, 128.9, 128.8, 128.2, 128.1,

127.9, 127.2, 126.8, 123.6, 119.7, 119.0, 116.6, 51.9, 37.0, 21.2. HRMS (ESI-TOF)  $m/z$ :  $[M + Na]^+$  Calcd for  $C_{30}H_{22}NaO_2$ , 437.1512; found 437.1516.

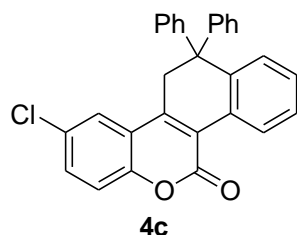

**9-chloro-12,12-diphenyl-11,12-dihydronaphtho[1,2-*c*]chromen-5-one 4c**

Colorless solid (50.0 mg, 100%), mp >250 °C.  $^1H$  NMR (400 MHz,  $CDCl_3$ ):  $\delta$  8.56, (d,  $J = 8.0$  Hz, 1H), 7.76 (d,  $J = 2.4$  Hz, 1H), 7.34-7.43 (m, 2H), 7.19-7.30 (m, 8H), 7.02-7.04 (m, 4H), 6.85 (d,  $J = 7.6$  Hz, 1H), 3.79 (s, 2H);  $^{13}C$  NMR (100 MHz,  $CDCl_3$ ):  $\delta$  158.2, 151.2, 146.0, 144.2, 142.9, 131.3, 130.3, 129.9, 128.9, 128.81, 128.78, 128.2, 128.1, 127.3, 127.0, 123.4, 120.9, 120.5, 118.3, 51.8, 37.0. HRMS (ESI-TOF)  $m/z$ :  $[M + Na]^+$  Calcd for  $C_{29}H_{19}ClNaO_2$ , 457.0966; found 457.0968.

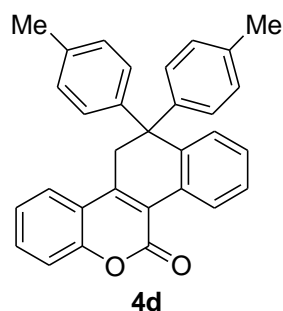

**12,12-dip-tolyl-11,12-dihydronaphtho[1,2-*c*]chromen-5-one 4d**

Colorless solid (50.0 mg, 100%), mp >250 °C.  $^1H$  NMR (400 MHz,  $CDCl_3$ ):  $\delta$  8.58, (d,  $J = 8.0$  Hz, 1H), 7.76 (d,  $J = 7.2$  Hz, 1H), 7.21-7.44 (m, 5H), 6.99 (d,  $J = 8.4$  Hz, 4H), 6.91 (d,  $J = 8.4$  Hz, 4H), 6.85 (d,  $J = 7.6$  Hz, 1H), 3.78 (s, 2H), 2.25 (s, 6H);  $^{13}C$  NMR (100 MHz,  $CDCl_3$ ):  $\delta$  158.9, 152.9, 147.5, 143.2, 141.6, 136.4, 131.4, 130.7, 128.8, 128.7, 128.3, 127.9, 127.1, 124.4, 123.9, 119.9, 119.4, 116.9, 51.2, 37.0, 20.9. HRMS (ESI-TOF)  $m/z$ :  $[M + Na]^+$  Calcd for  $C_{31}H_{24}NaO_2$ , 451.1669; found 451.1681.

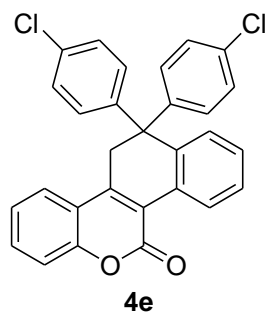

**12,12-bis(4-chlorophenyl)-11,12-dihydronaphtho[1,2-*c*]chromen-5-one 4e**

Colorless solid (50.0 mg, 100%), mp >250 °C. <sup>1</sup>H NMR (400 MHz, CDCl<sub>3</sub>): δ 8.59, (d, *J* = 7.6 Hz, 1H), 7.77 (d, *J* = 7.6 Hz, 1H), 7.27-7.51 (m, 5H), 7.19 (d, *J* = 8.4 Hz, 4H), 6.97 (d, *J* = 8.4 Hz, 4H), 6.79 (d, *J* = 7.6 Hz, 1H), 3.77 (s, 2H); <sup>13</sup>C NMR (100 MHz, CDCl<sub>3</sub>): δ 158.6, 152.9, 146.7, 142.7, 141.7, 133.1, 131.7, 130.5, 130.1, 128.6, 128.4, 128.3, 127.7, 124.5, 123.7, 119.8, 119.0, 117.1, 51.2, 36.9. HRMS (ESI-TOF) *m/z*: [M + Na]<sup>+</sup> Calcd for C<sub>29</sub>H<sub>18</sub>Cl<sub>2</sub>NaO<sub>2</sub>, 491.0576; found 491.0599.

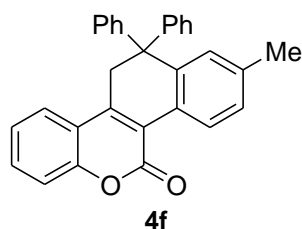

**2-methyl-12,12-diphenyl-11,12-dihydronaphtho[1,2-*c*]chromen-5-one 4f**

Colorless solid (50.0 mg, 100%), mp >250 °C. <sup>1</sup>H NMR (400 MHz, CDCl<sub>3</sub>): δ 8.50, (d, *J* = 8.0 Hz, 1H), 7.77-7.79 (m, 1H), 7.44-7.46 (m, 1H), 7.18-7.30 (m, 9H), 7.03-7.06 (m, 4H), 6.65 (s, 1H), 3.81 (s, 2H), 2.28 (s, 3H); <sup>13</sup>C NMR (100 MHz, CDCl<sub>3</sub>): δ 158.9, 152.8, 146.4, 144.6, 142.7, 138.4, 131.1, 129.5, 128.8, 128.1, 128.0, 127.9, 126.8, 124.3, 123.7, 120.0, 119.4, 116.9, 51.9, 37.1, 21.6. HRMS (ESI-TOF) *m/z*: [M + Na]<sup>+</sup> Calcd for C<sub>30</sub>H<sub>22</sub>NaO<sub>2</sub>, 437.1512; found 437.1519.

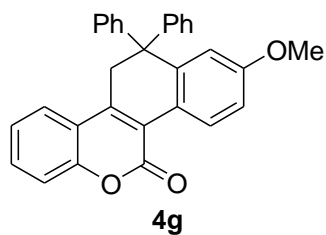

**2-methoxy-12,12-diphenyl-11,12-dihydronaphtho[1,2-*c*]chromen-5-one 4g**

Colorless solid (50.0 mg, 100%), mp 232-234 °C. <sup>1</sup>H NMR (400 MHz, CDCl<sub>3</sub>): δ 8.61,

(d,  $J = 9.2$  Hz, 1H), 7.76-7.78 (m, 1H), 7.43-7.45 (m, 1H), 7.18-7.28 (m, 8H), 7.03-7.06 (m, 4H), 6.90-6.93 (m, 1H), 6.40 (d,  $J = 2.8$  Hz, 1H), 3.82 (s, 2H), 3.73 (s, 3H);  $^{13}\text{C}$  NMR (100 MHz,  $\text{CDCl}_3$ ):  $\delta$  159.5, 159.0, 152.6, 145.2, 144.9, 144.3, 130.9, 129.6, 128.8, 128.1, 126.9, 124.3, 123.8, 123.6, 119.8, 119.5, 116.8, 116.0, 111.1, 55.2, 52.1, 36.9. HRMS (ESI-TOF)  $m/z$ :  $[\text{M} + \text{Na}]^+$  Calcd for  $\text{C}_{30}\text{H}_{22}\text{NaO}_3$ , 453.1461; found 453.1454.

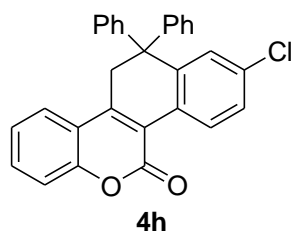

#### **2-chloro-12,12-diphenyl-11,12-dihydronaphtho[1,2-c]chromen-5-one 4h**

Colorless solid (50.0 mg, 100%), mp 248-250 °C.  $^1\text{H}$  NMR (400 MHz,  $\text{CDCl}_3$ ):  $\delta$  8.58, (d,  $J = 8.8$  Hz, 1H), 7.78-7.80 (m, 1H), 7.49-7.50 (m, 1H), 7.20-7.30 (m, 9H), 7.01-7.04 (m, 4H), 6.83 (d,  $J = 2.4$  Hz, 1H), 3.87 (s, 2H);  $^{13}\text{C}$  NMR (100 MHz,  $\text{CDCl}_3$ ):  $\delta$  158.6, 152.9, 147.4, 144.8, 143.7, 134.3, 131.7, 129.4, 129.2, 128.8, 128.7, 128.3, 127.4, 127.2, 124.5, 123.9, 119.10, 119.07, 117.0, 51.9, 36.9. HRMS (ESI-TOF)  $m/z$ :  $[\text{M} + \text{Na}]^+$  Calcd for  $\text{C}_{29}\text{H}_{19}\text{ClNaO}_2$ , 457.0966; found 457.0986.

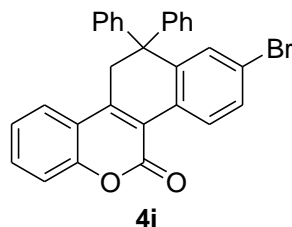

#### **2-bromo-12,12-diphenyl-11,12-dihydronaphtho[1,2-c]chromen-5-one 4i**

Colorless solid (50.0 mg, 100%), mp 256-258 °C.  $^1\text{H}$  NMR (400 MHz,  $\text{CDCl}_3$ ):  $\delta$  8.42 (d,  $J = 8.4$  Hz, 1H), 7.69-7.72 (m, 1H), 7.39-7.45 (m, 2H), 7.12-7.23 (m, 8H), 6.90-6.95 (m, 5H), 3.74 (s, 2H);  $^{13}\text{C}$  NMR (100 MHz,  $\text{CDCl}_3$ ):  $\delta$  158.6, 152.9, 147.5, 145.0, 143.7, 137.8, 131.7, 130.4, 129.6, 128.7, 128.3, 127.2, 124.5, 123.9, 122.7, 119.1, 119.0, 117.0, 51.9, 36.9. HRMS (ESI-TOF)  $m/z$ :  $[\text{M} + \text{Na}]^+$  Calcd for  $\text{C}_{29}\text{H}_{19}\text{BrNaO}_2$ , 501.0461; found 501.0475.

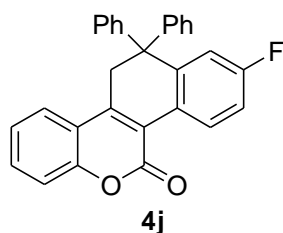

**2-fluoro-12,12-diphenyl-11,12-dihydro-naphtho[1,2-c]chromen-5-one 4i**

Colorless solid (50.0 mg, 100%), mp 235-237 °C. <sup>1</sup>H NMR (400 MHz, CDCl<sub>3</sub>): δ 8.61-8.65 (m, 1H), 7.76-7.79 (m, 1H), 7.45-7.46 (m, 1H), 7.02-7.23 (m, 8H), 7.02-7.04 (m, 5H), 6.56-6.59 (m, 1H), 3.83 (s, 2H); <sup>13</sup>C NMR (100 MHz, CDCl<sub>3</sub>): δ 162.4 (d, *J* = 248 Hz), 158.8, 152.8, 146.7, 145.8 (d, *J* = 6 Hz), 143.8, 131.5, 130.2 (d, *J* = 8 Hz), 128.7, 128.3, 127.1, 126.9 (d, *J* = 3 Hz), 124.5, 123.8, 119.2, 116.9, 116.2 (d, *J* = 24 Hz), 113.9 (d, *J* = 21 Hz), 52.0, 36.7. HRMS (ESI-TOF) *m/z*: [M + Na]<sup>+</sup> Calcd for C<sub>29</sub>H<sub>19</sub>FN<sub>2</sub>O<sub>2</sub>, 441.1261; found 441.1263.

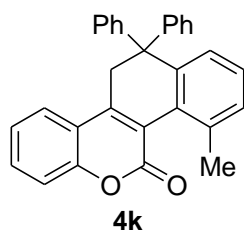

**4-methyl-12,12-diphenyl-11,12-dihydro-naphtho[1,2-c]chromen-5-one 4k**

Colorless solid (50.0 mg, 100%), mp >250 °C. <sup>1</sup>H NMR (400 MHz, CDCl<sub>3</sub>): δ 7.74-7.76 (m, 1H), 7.44-7.46 (m, 1H), 7.23-7.28 (m, 5H), 6.70-7.20 (m, 9H), 6.57 (d, *J* = 7.6 Hz, 1H), 3.82 (s, 2H), 2.41 (s, 3H); <sup>13</sup>C NMR (100 MHz, CDCl<sub>3</sub>): δ 157.8, 153.1, 149.9, 144.8, 136.6, 131.3, 130.33, 130.27, 128.4, 128.2, 128.1, 127.9, 126.8, 126.0, 124.1, 123.9, 121.4, 119.4, 116.8, 53.7, 37.3, 22.3. HRMS (ESI-TOF) *m/z*: [M + Na]<sup>+</sup> Calcd for C<sub>30</sub>H<sub>22</sub>NaO<sub>2</sub>, 437.1512; found 437.1533.

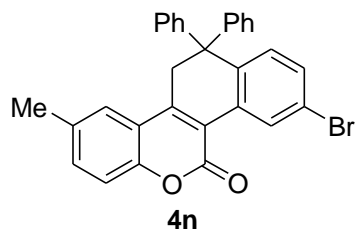

**3-bromo-9-methyl-12,12-diphenyl-11,12-dihydro-naphtho[1,2-c]chromen-5-one**

**4n**

Colorless solid (Purified by crystallization, 41.0 mg, 82%), mp >250 °C. <sup>1</sup>H NMR

(400 MHz, CDCl<sub>3</sub>):  $\delta$  8.78 (d,  $J = 2.0$  Hz, 1H), 7.58 (s, 1H), 7.36-7.39 (m, 2H), 7.17-7.31 (m, 7H), 7.02-7.04 (m, 4H), 6.73 (d,  $J = 8.4$  Hz, 1H), 3.82 (s, 2H), 2.44 (s, 3H); <sup>13</sup>C NMR (100 MHz, CDCl<sub>3</sub>):  $\delta$  158.6, 151.2, 148.2, 143.9, 141.6, 134.2, 133.1, 132.6, 131.0, 130.7, 130.4, 128.7, 128.3, 127.1, 123.8, 121.5, 118.7, 118.6, 116.8, 51.6, 36.9, 21.2. HRMS (ESI-TOF)  $m/z$ : [M + Na]<sup>+</sup> Calcd for C<sub>30</sub>H<sub>21</sub>BrNaO<sub>2</sub>, 515.0617; found 515.0614.

# NMR spectra of new compounds

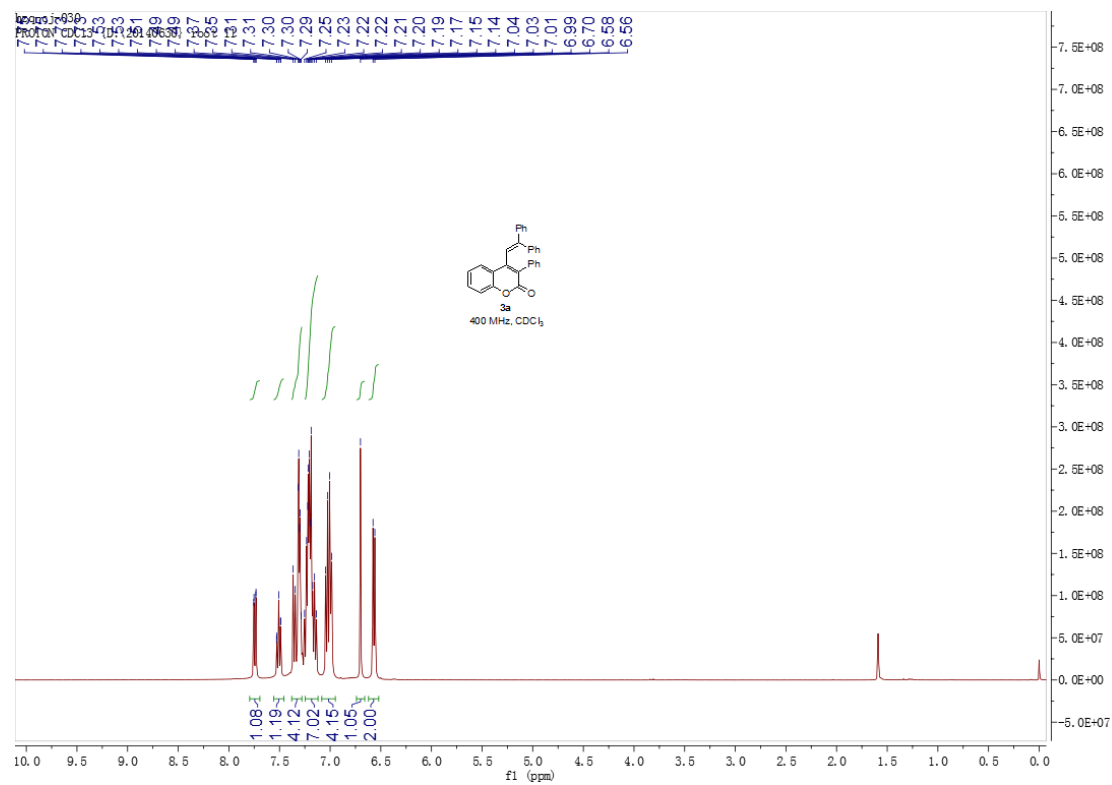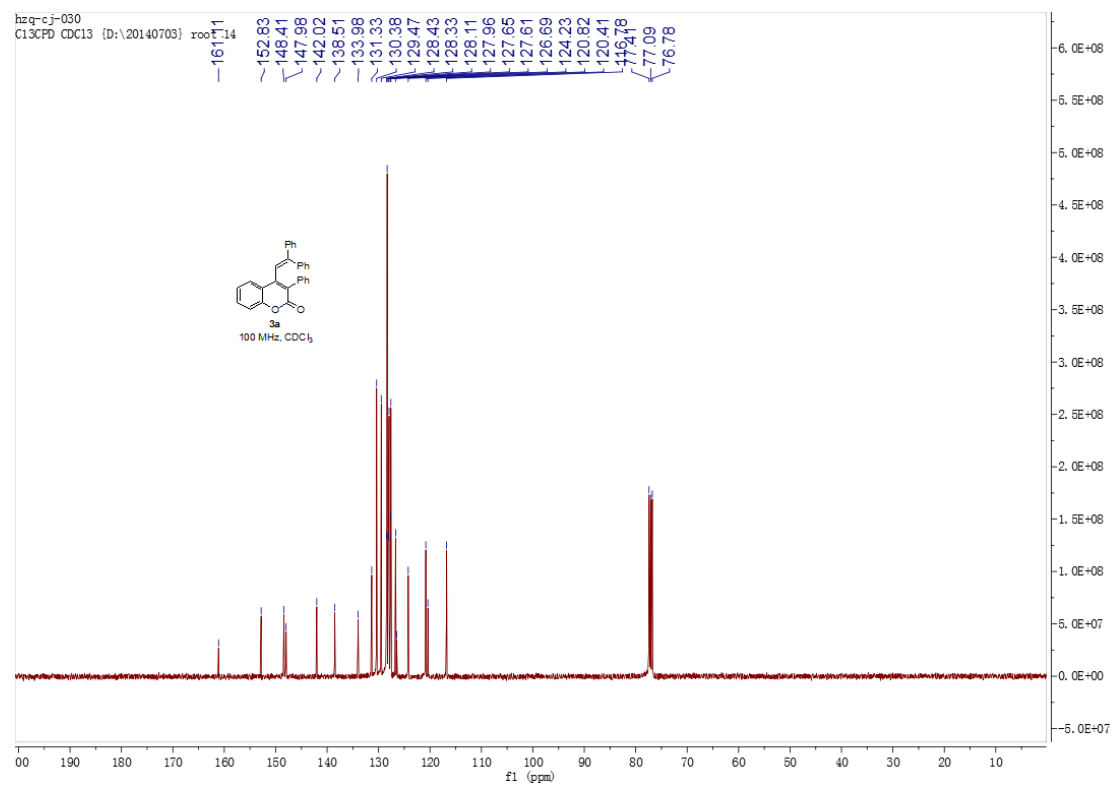

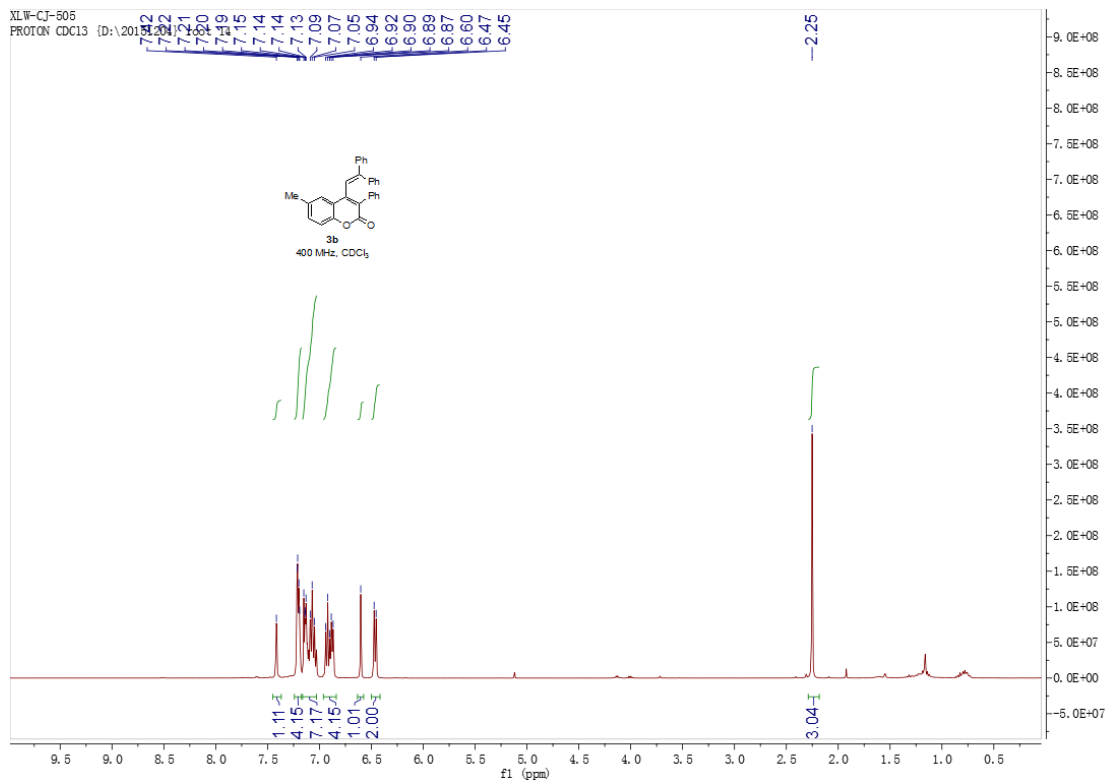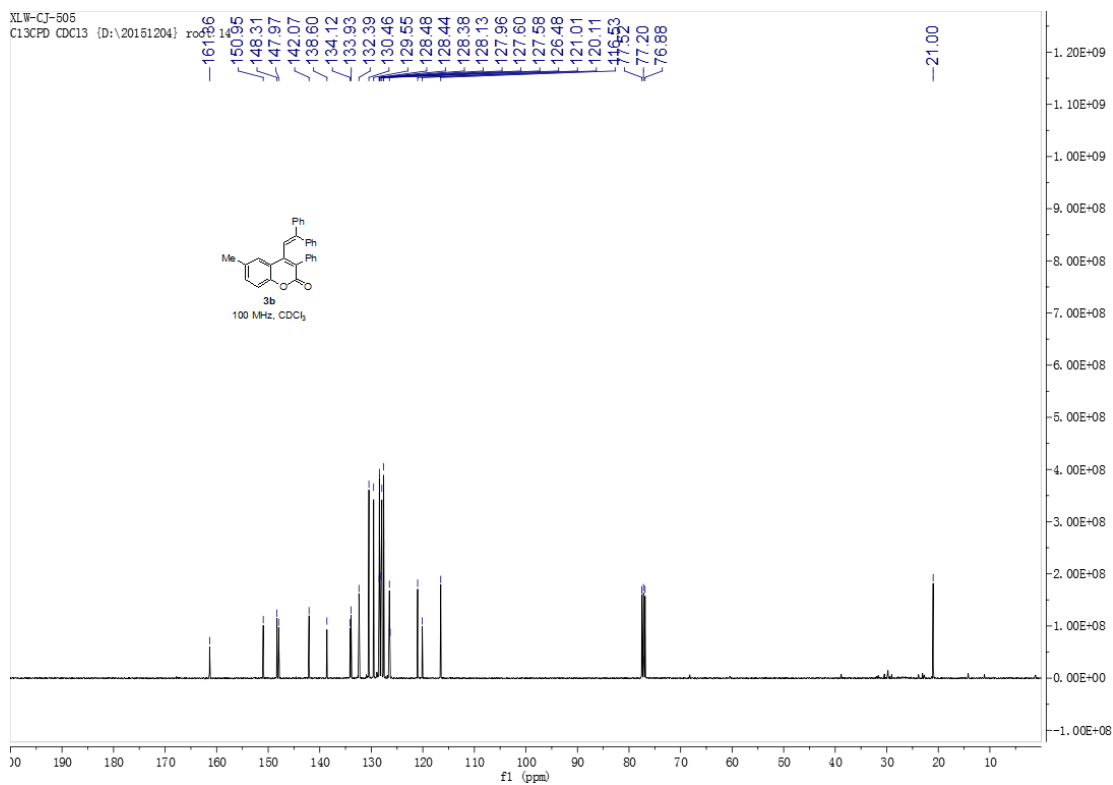



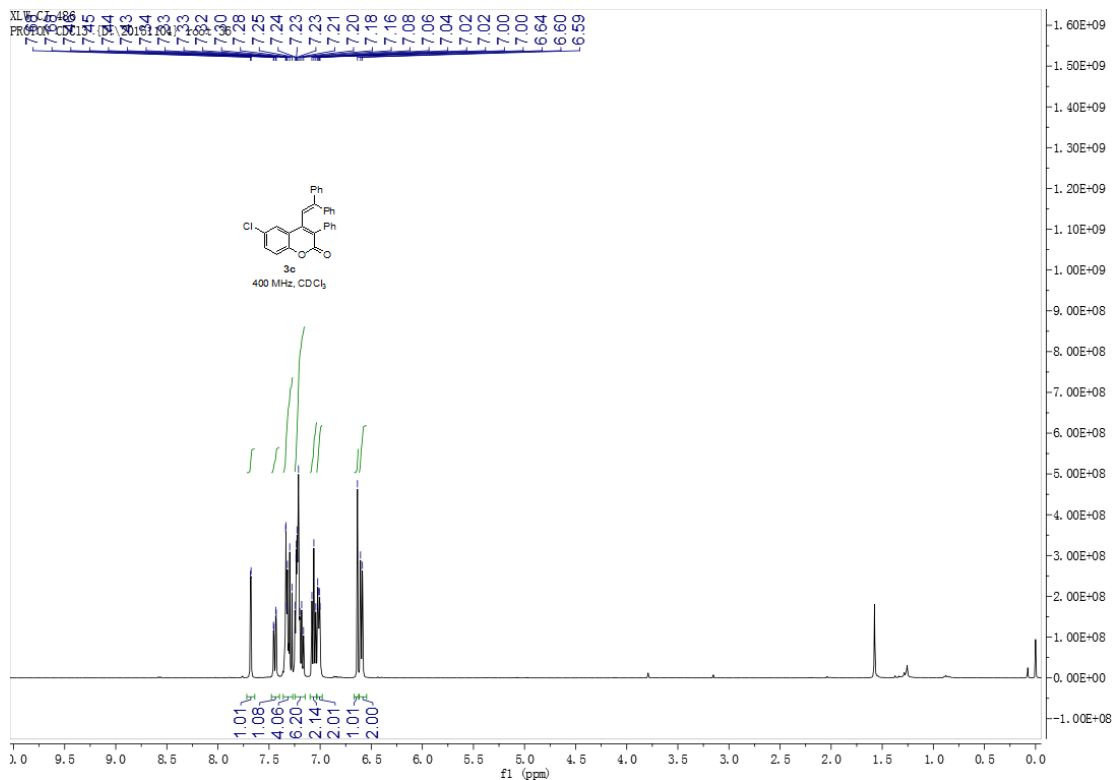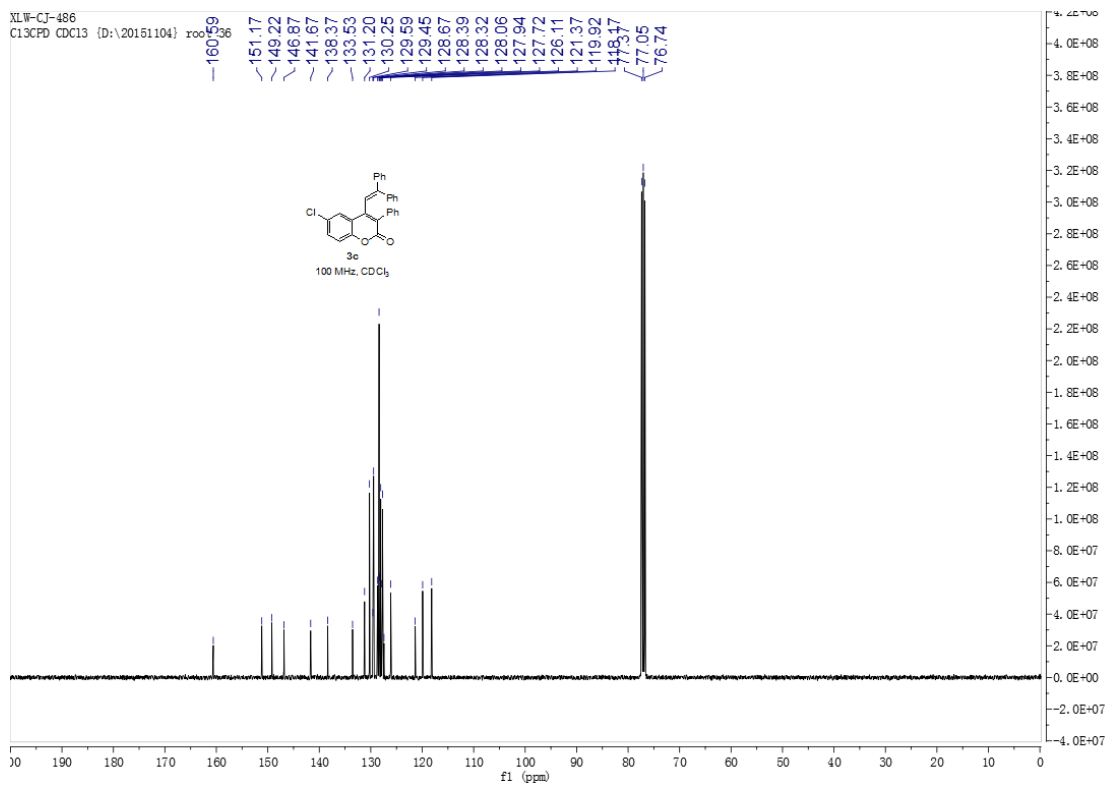

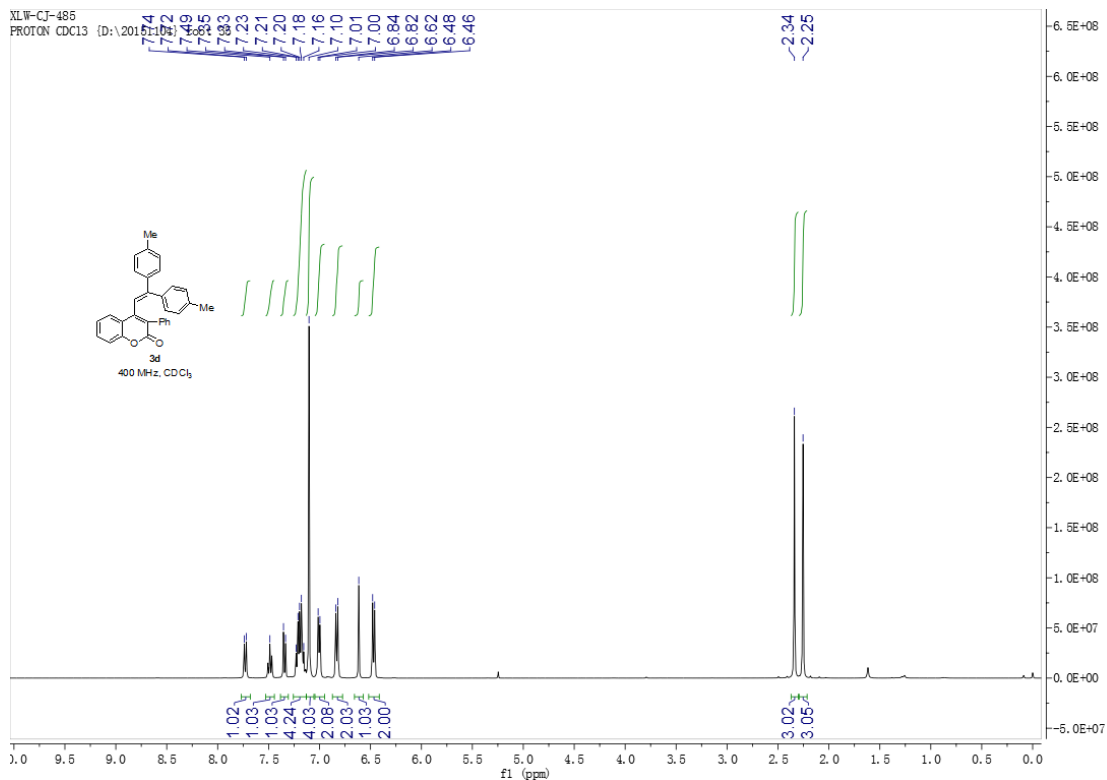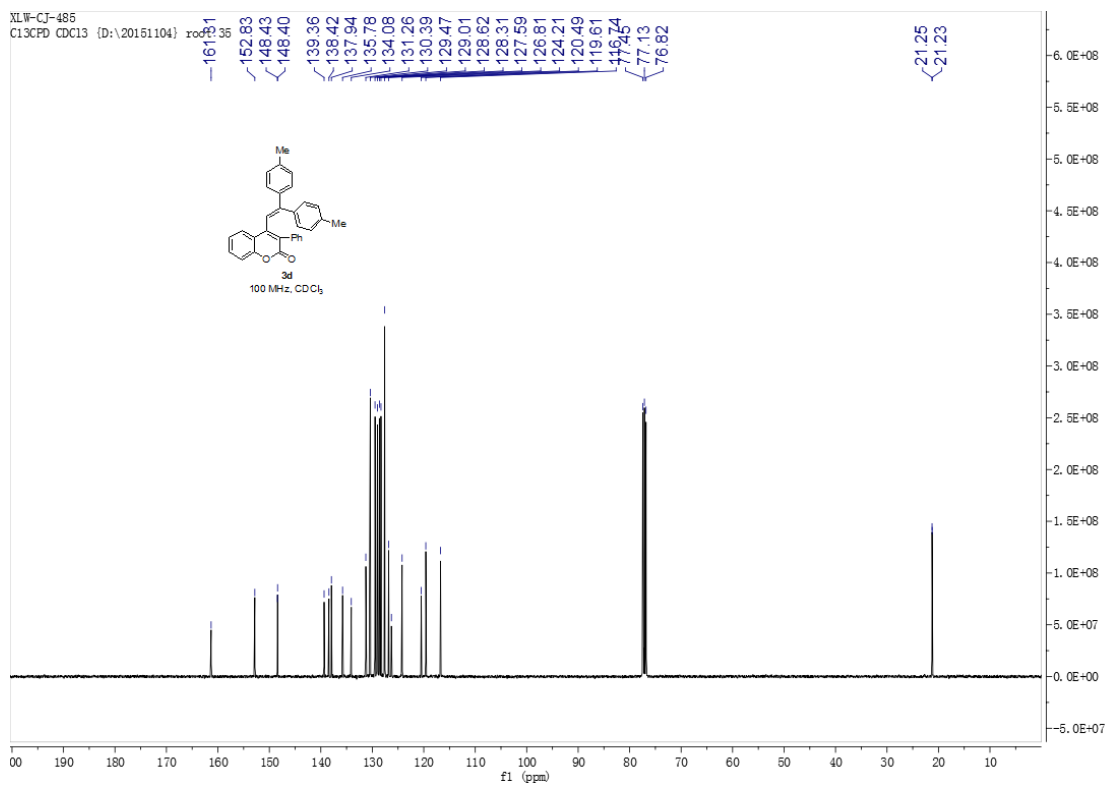

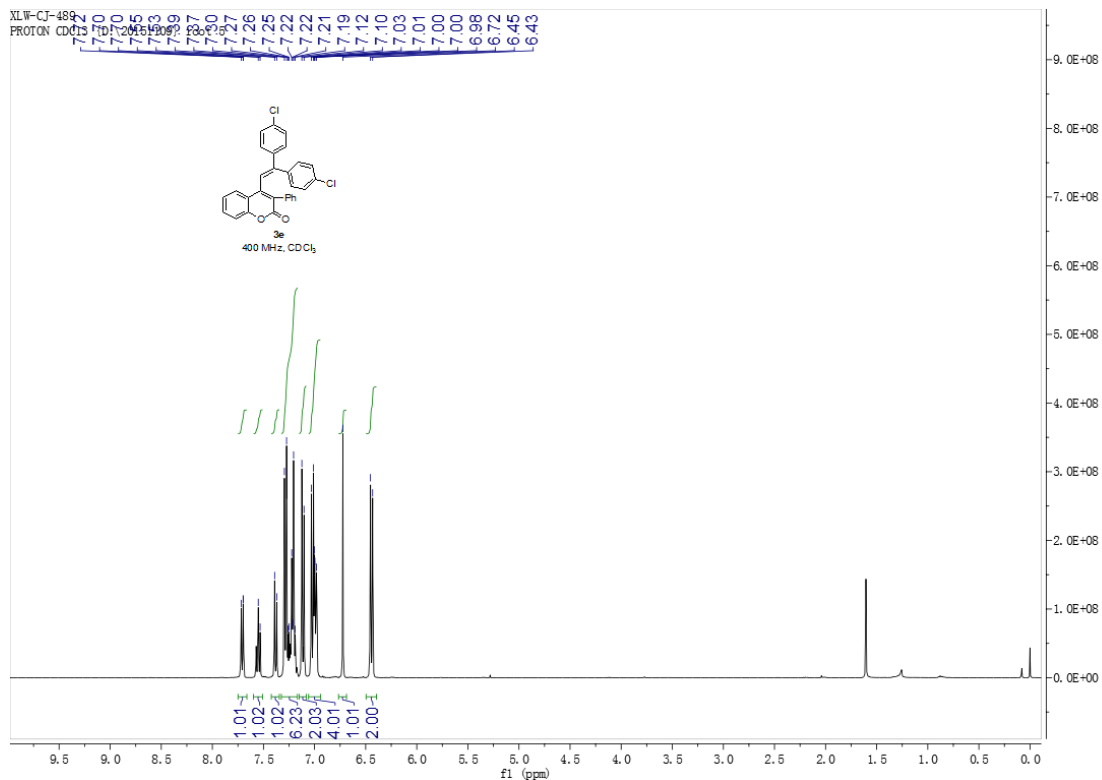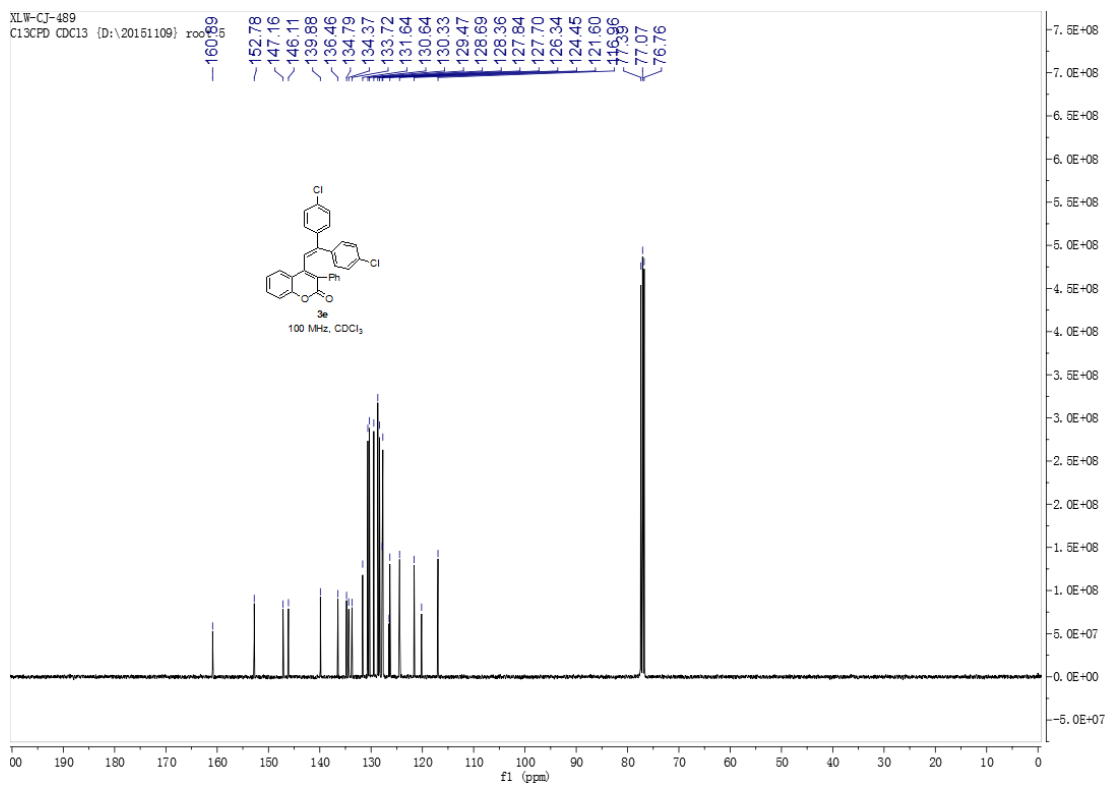

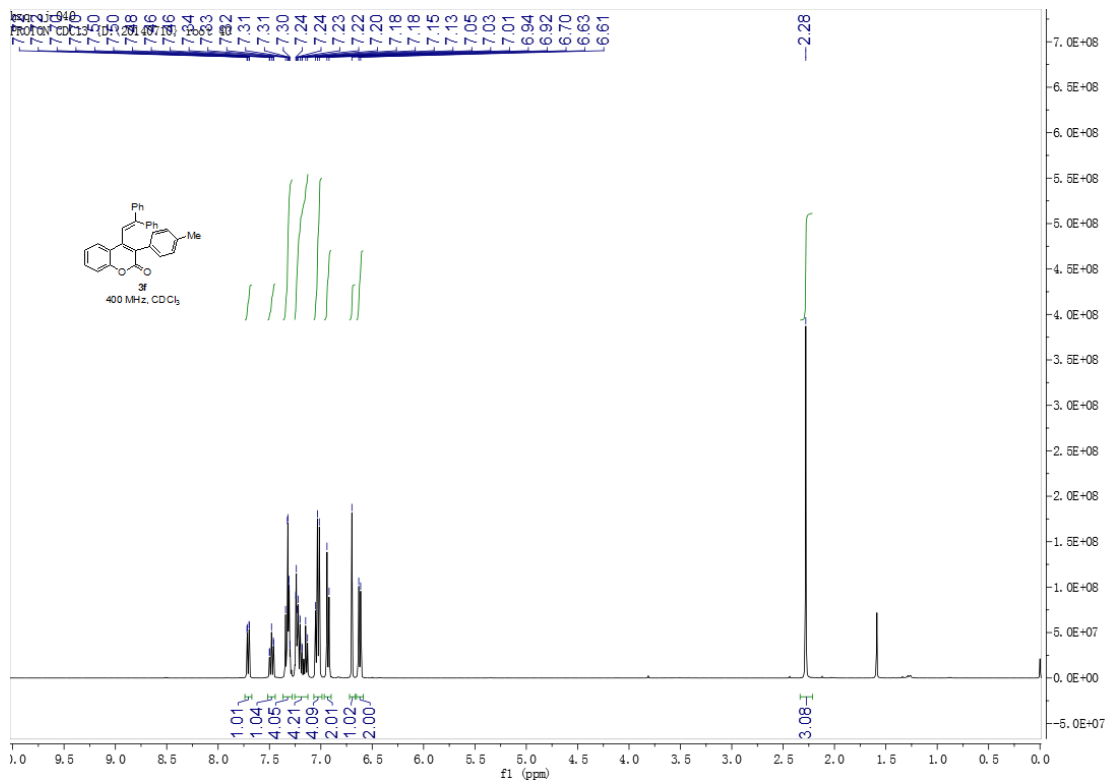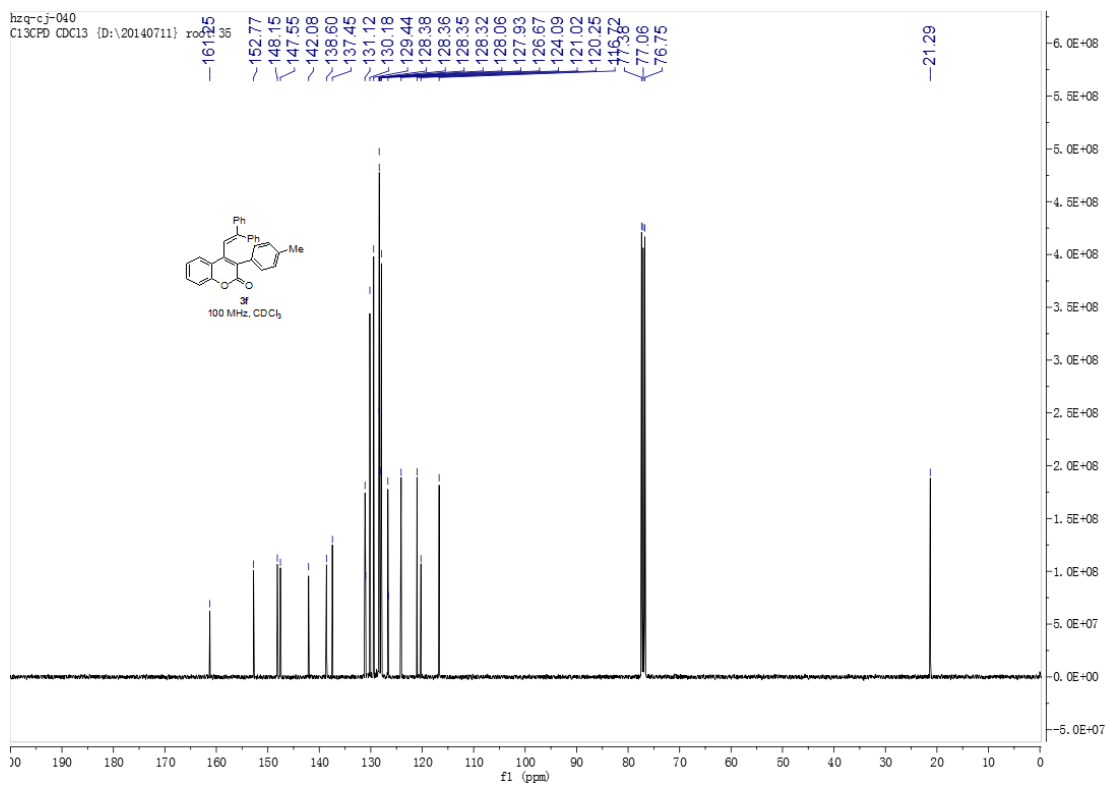

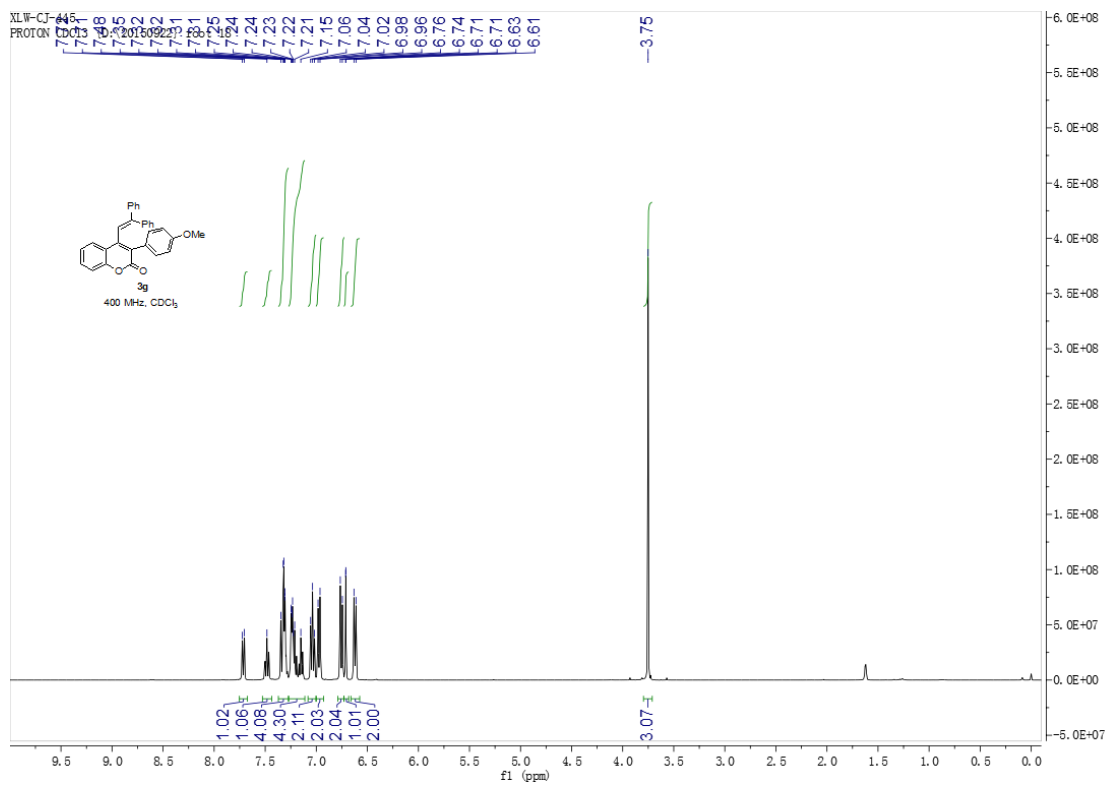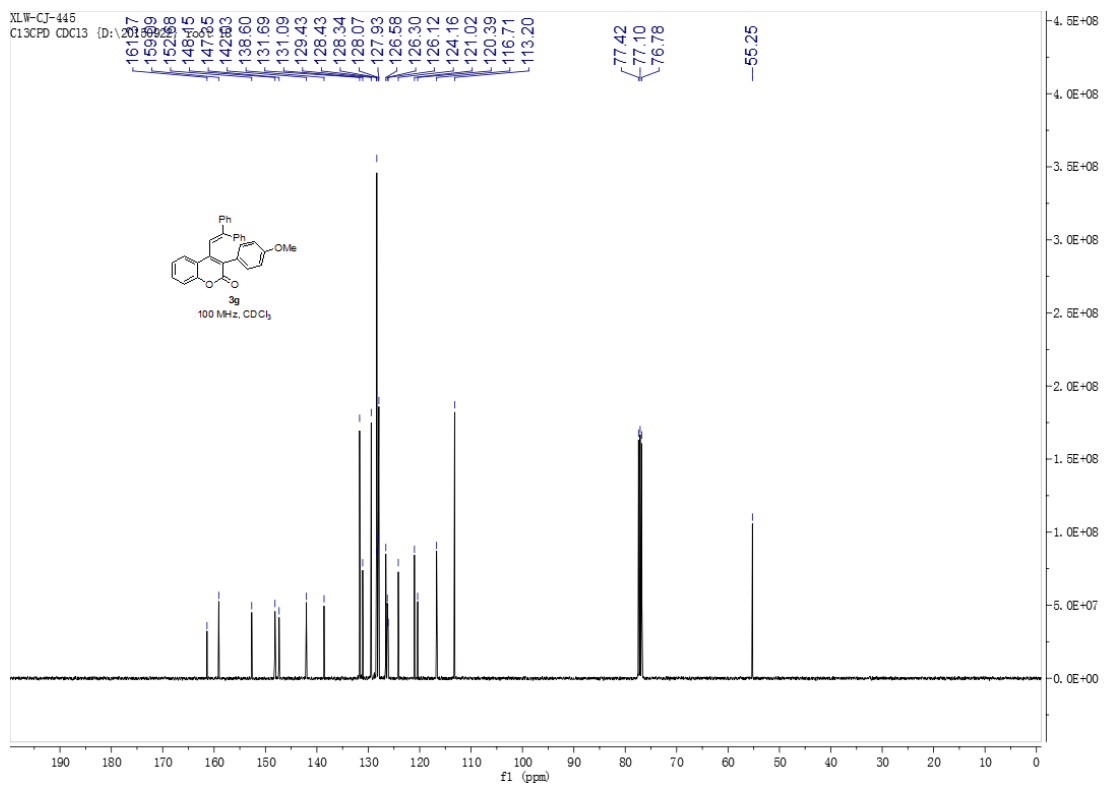

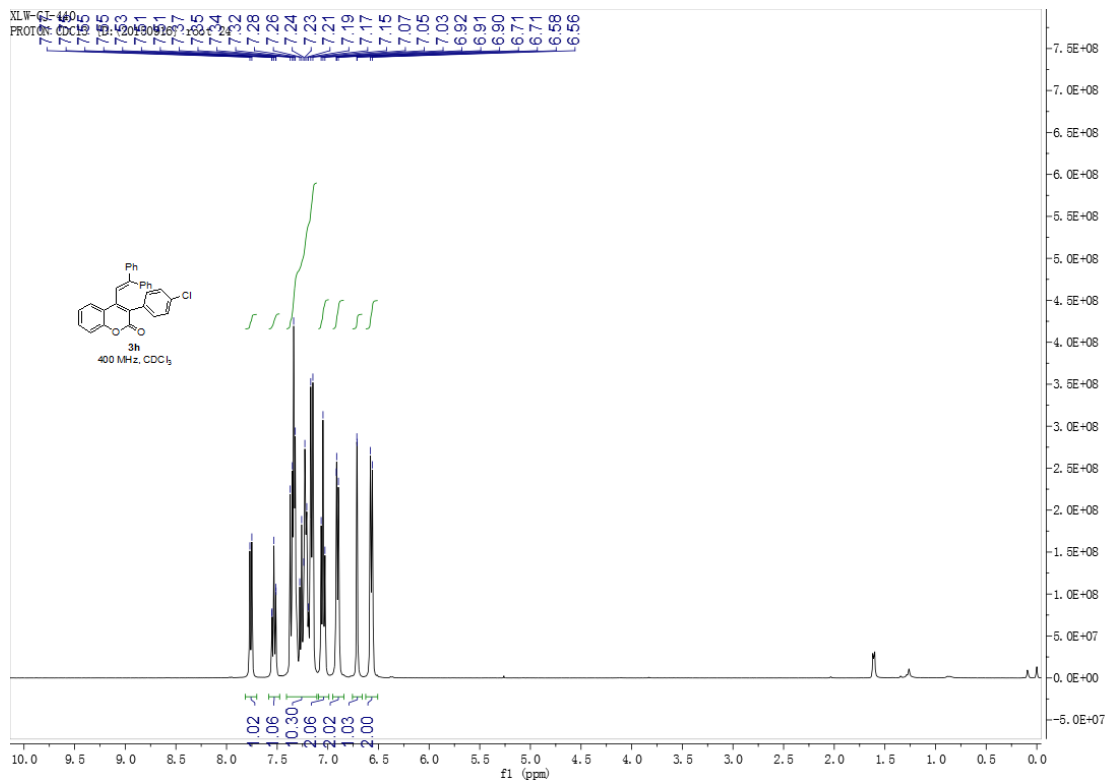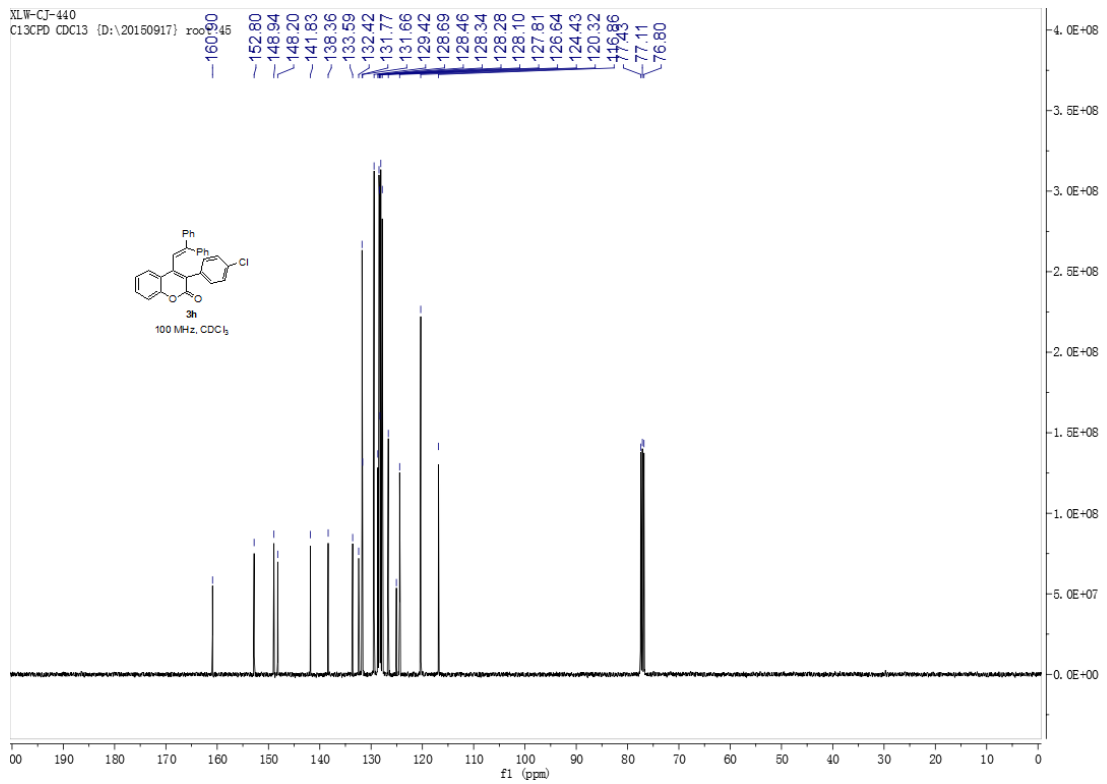

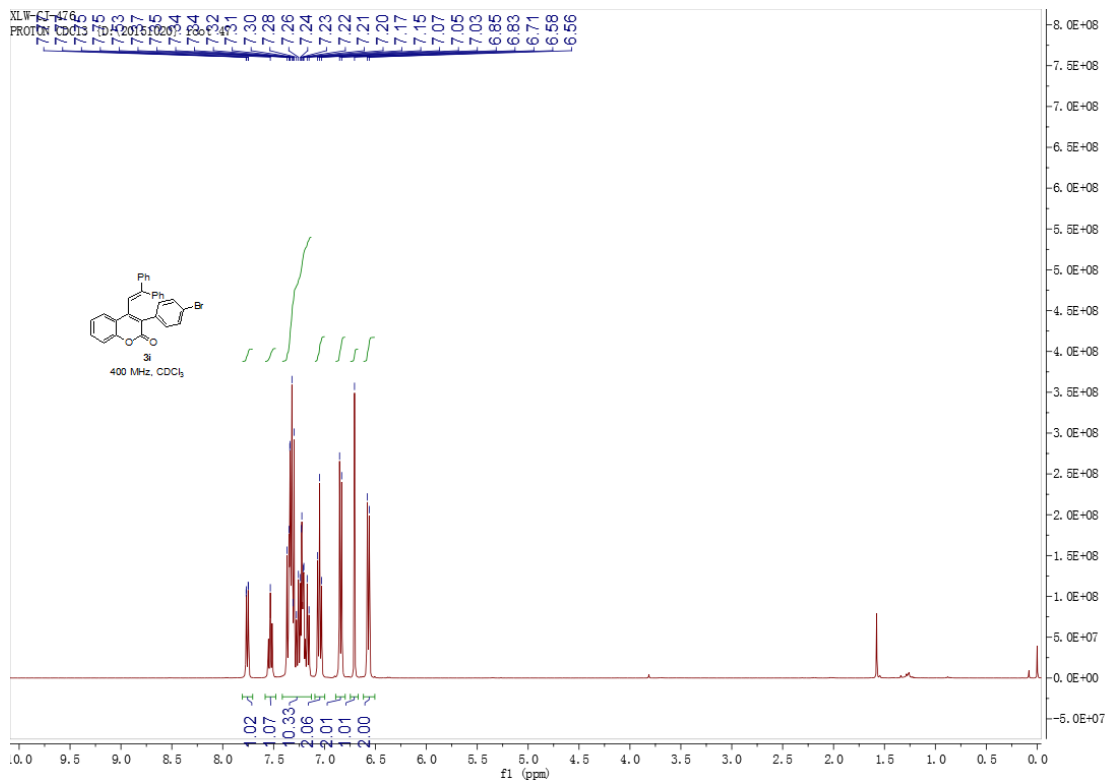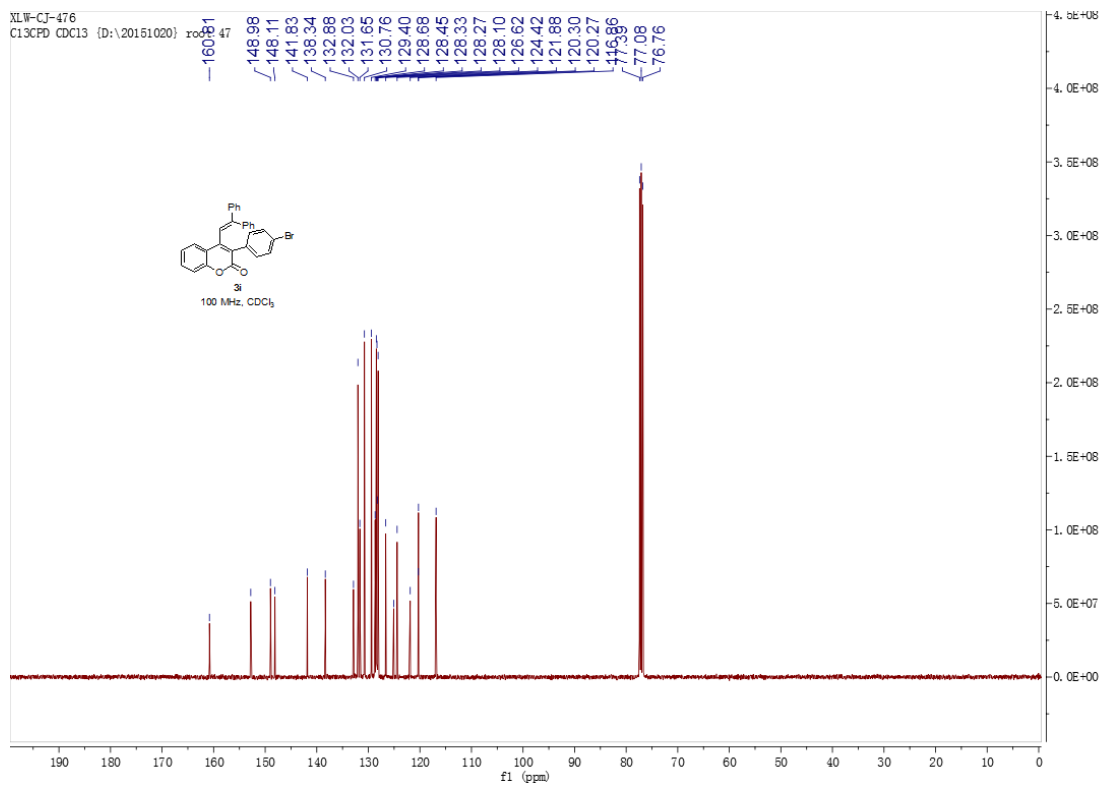

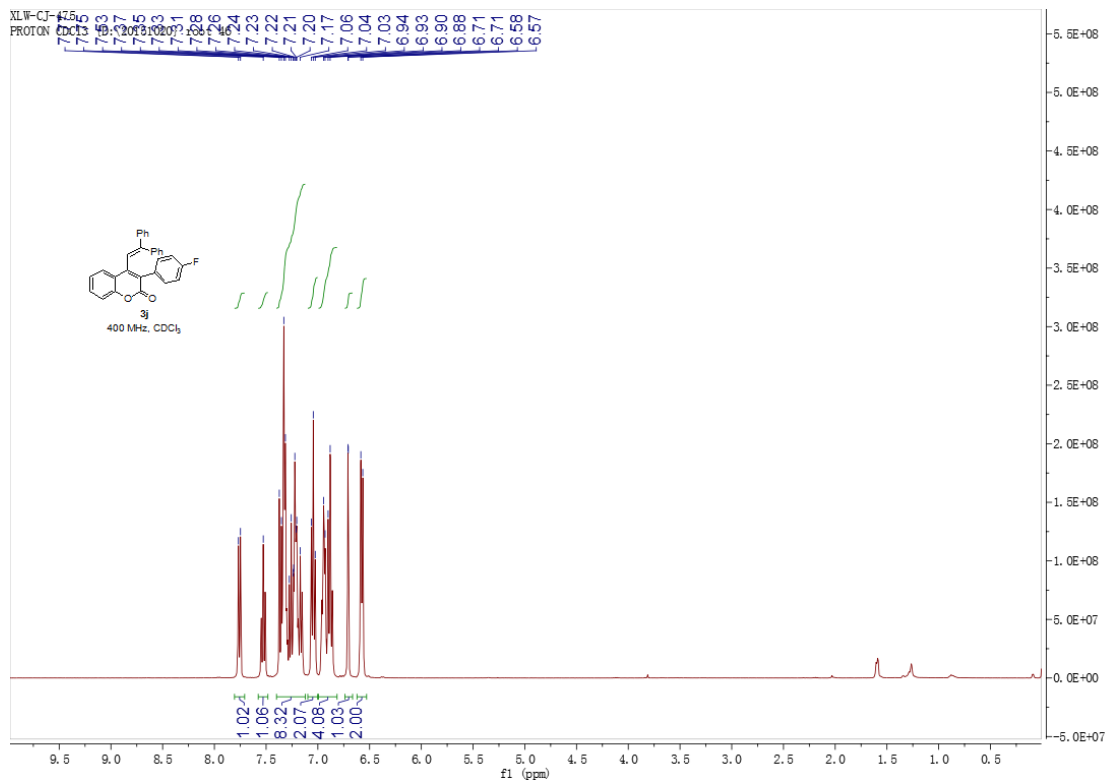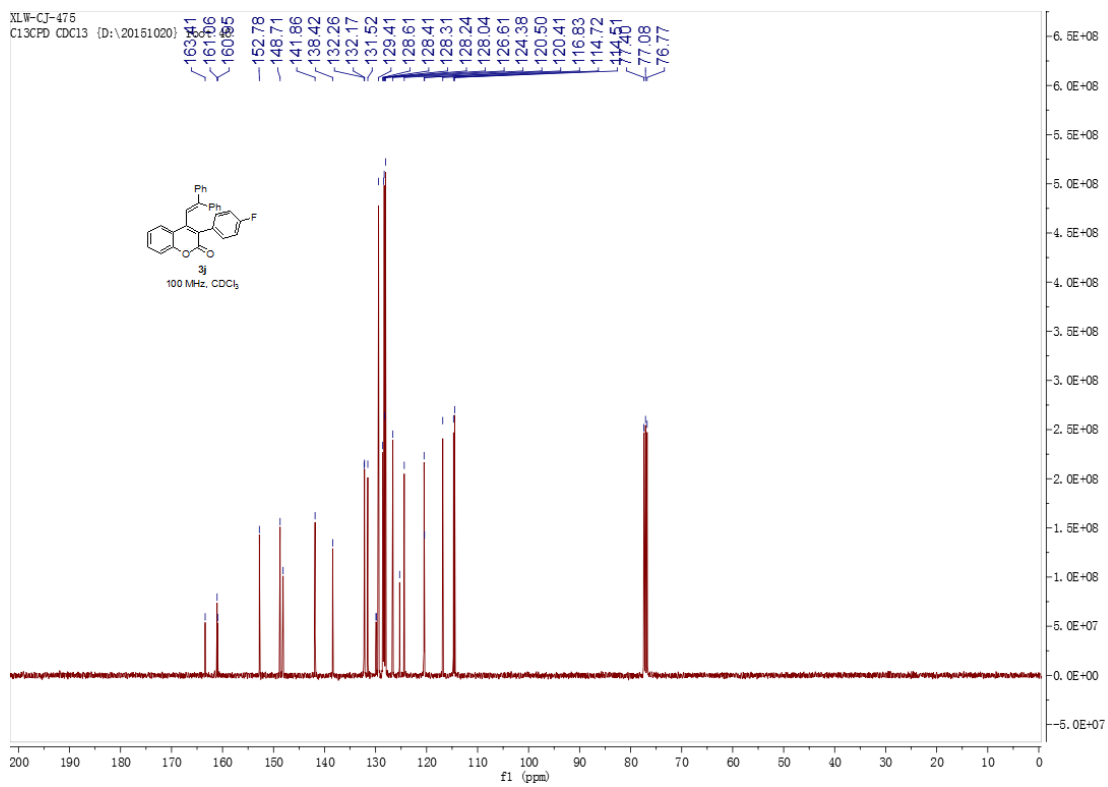



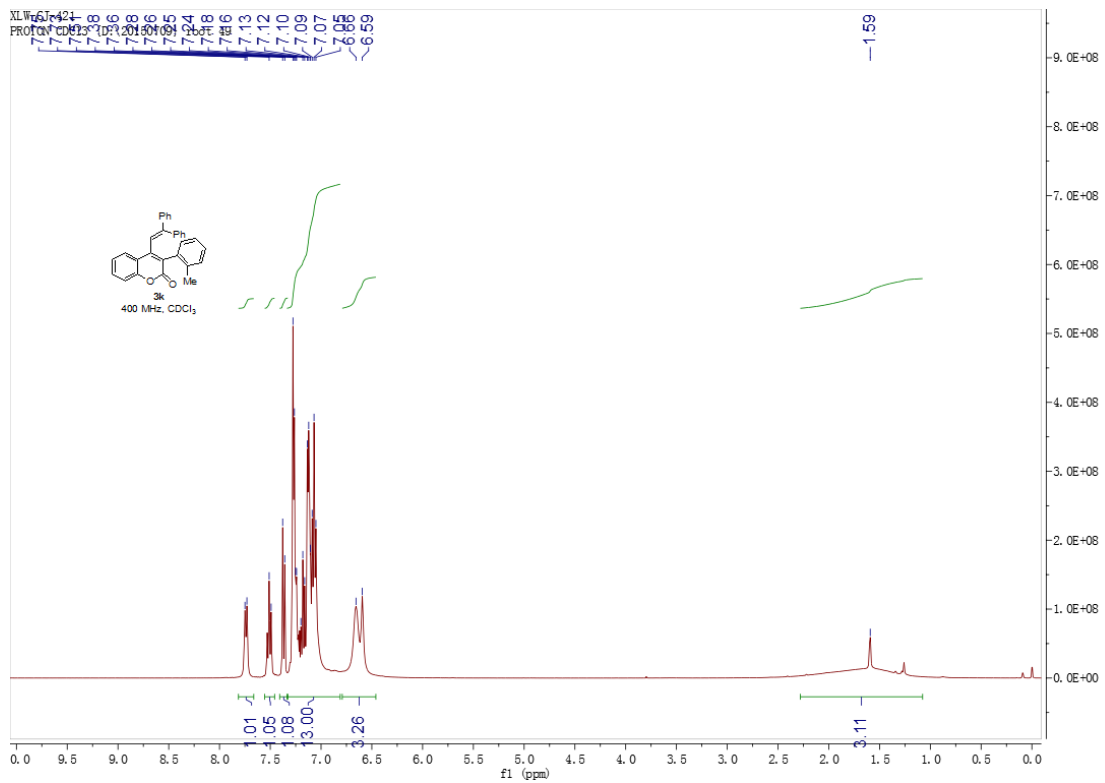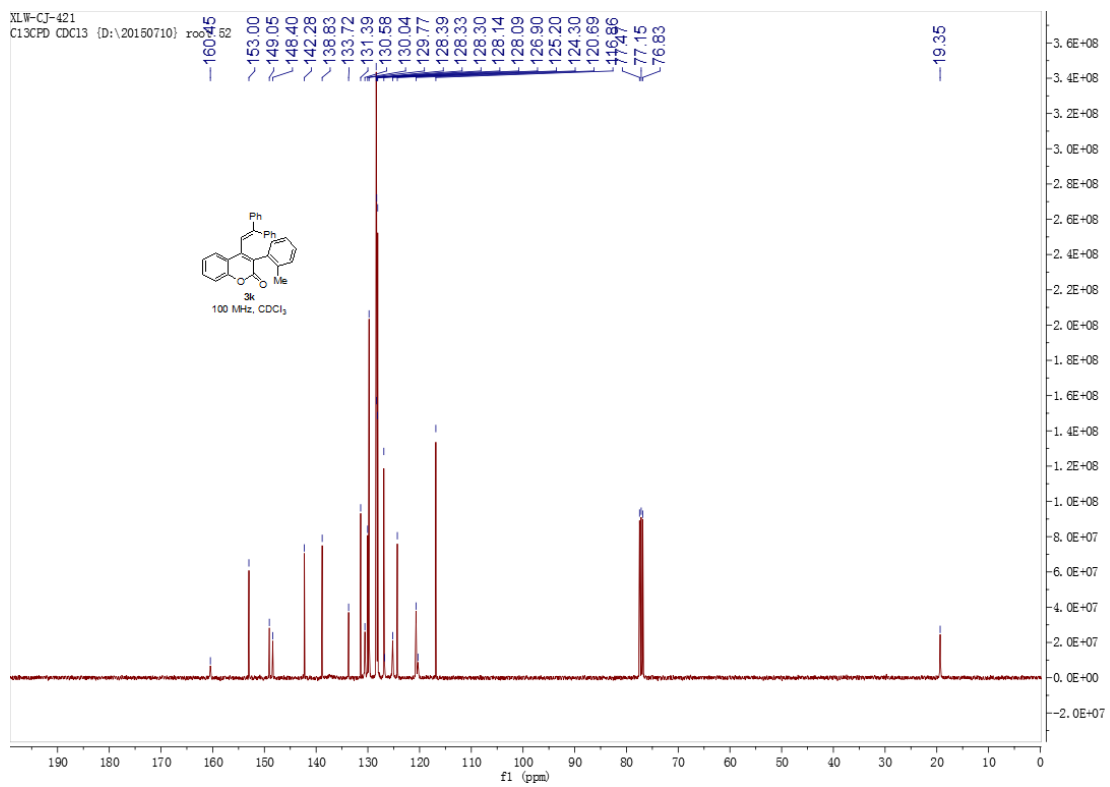

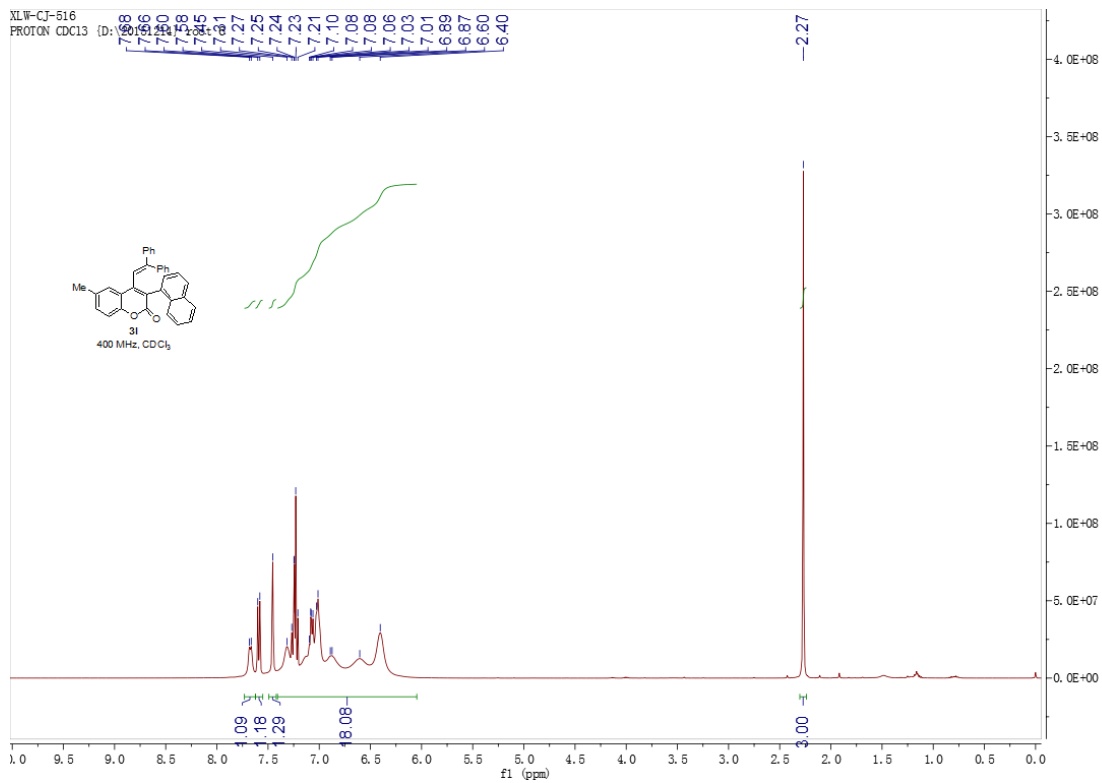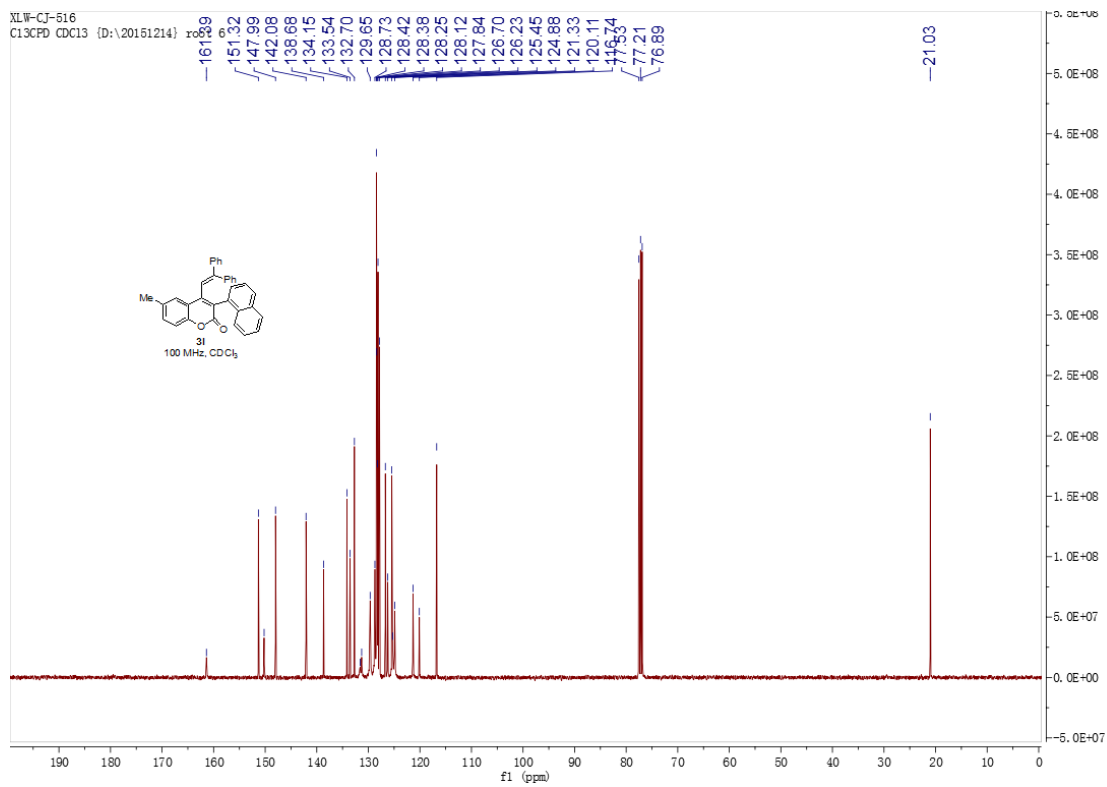

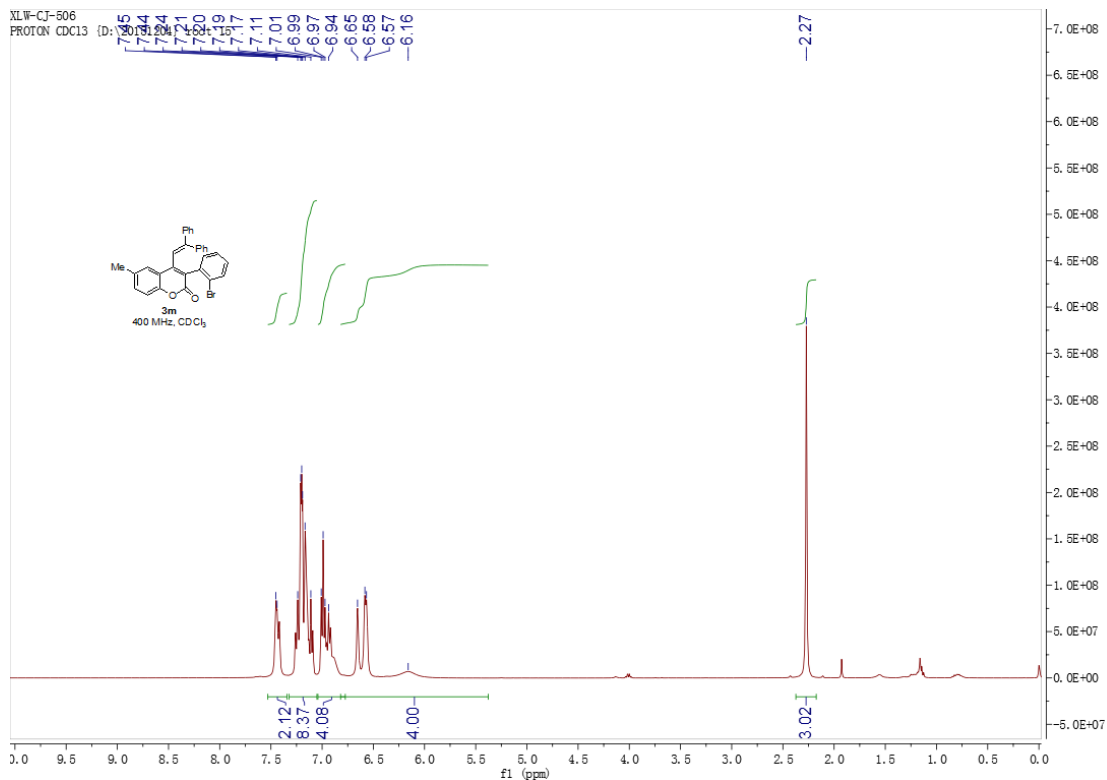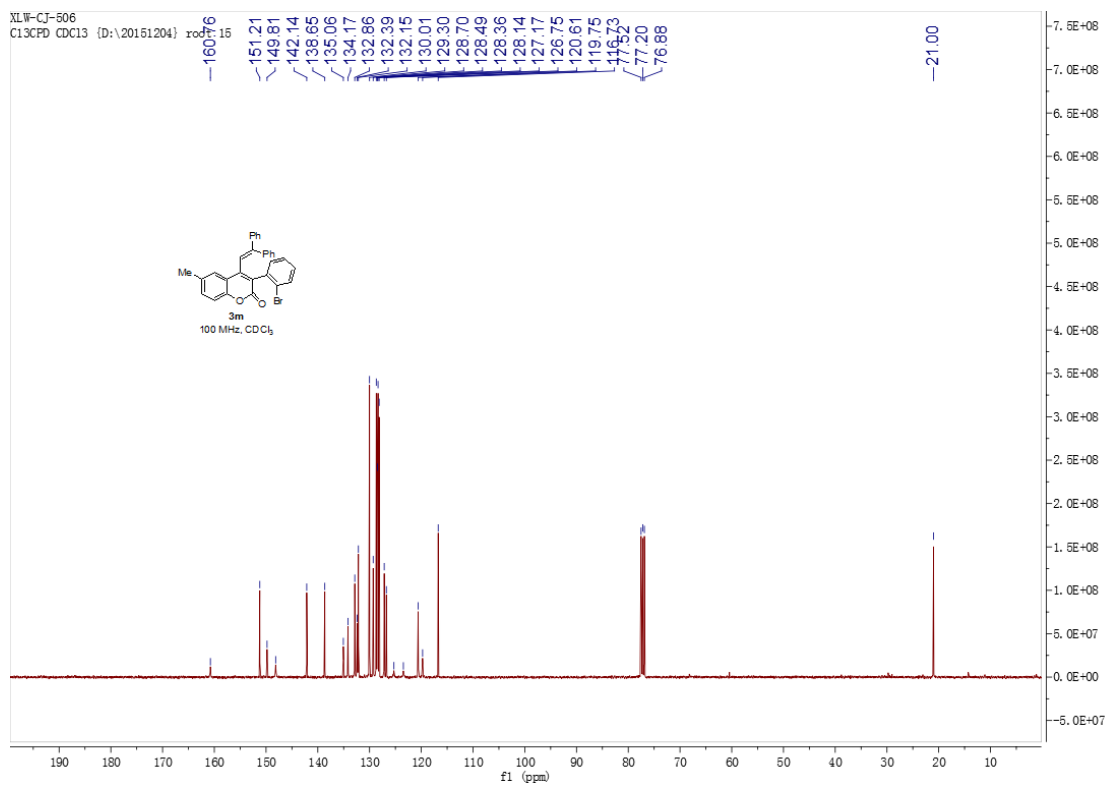

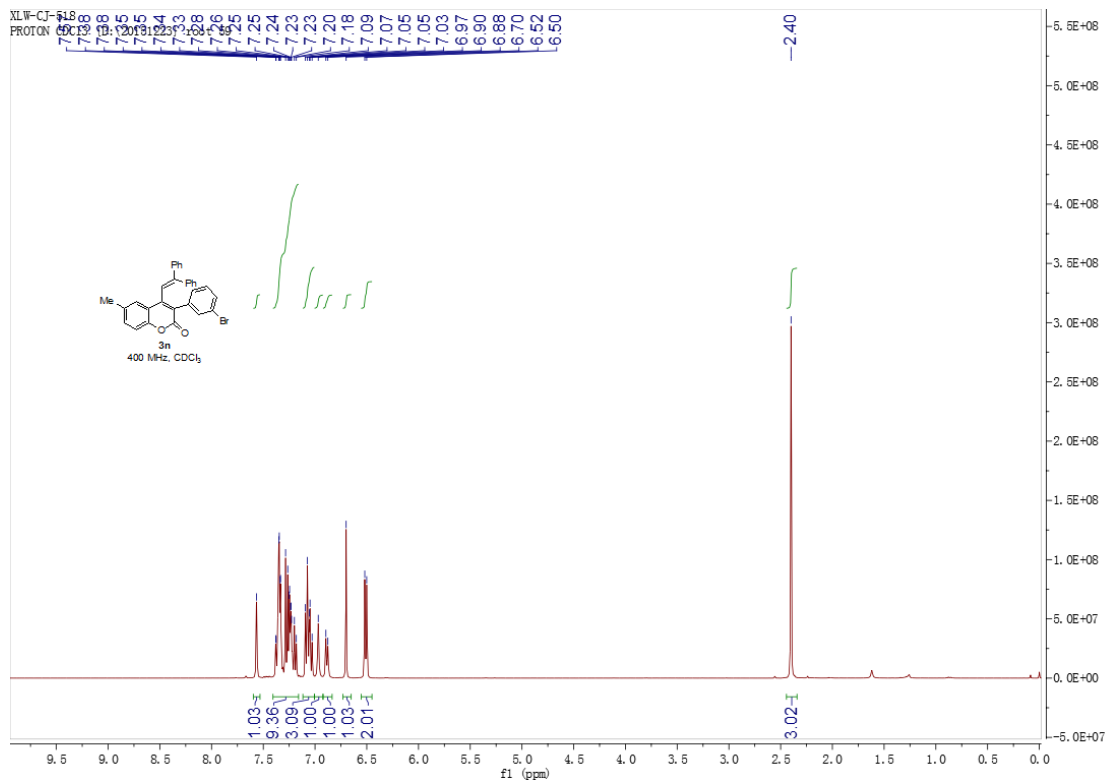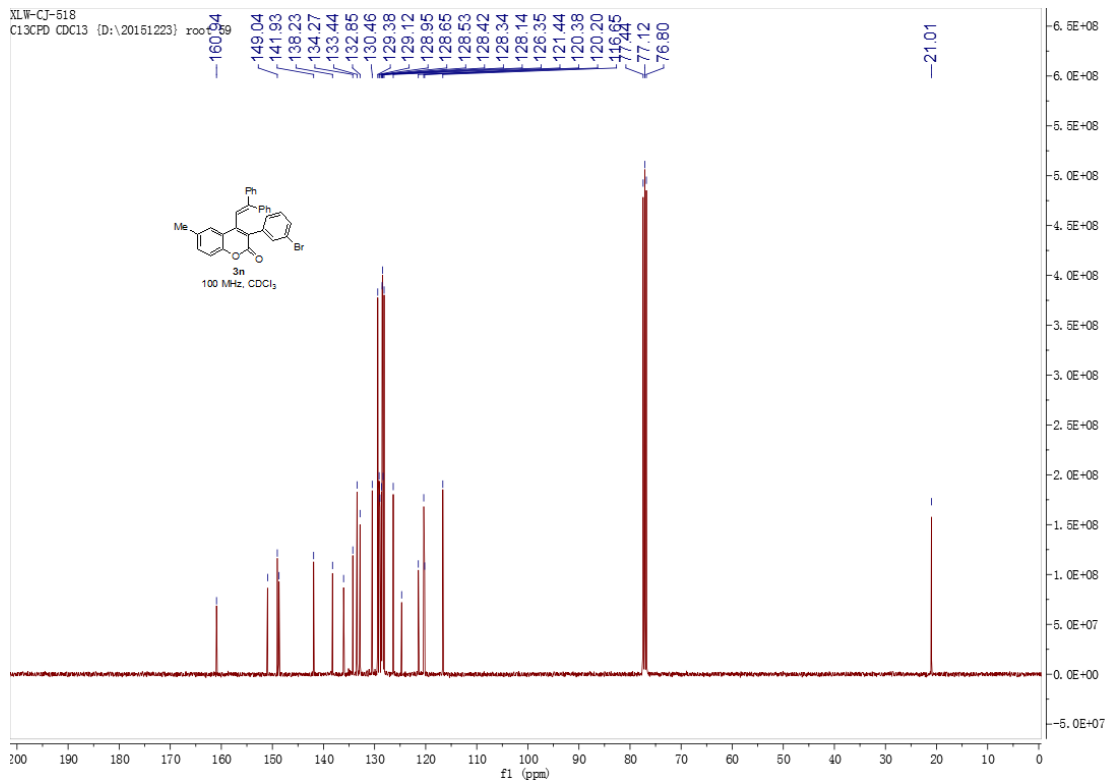

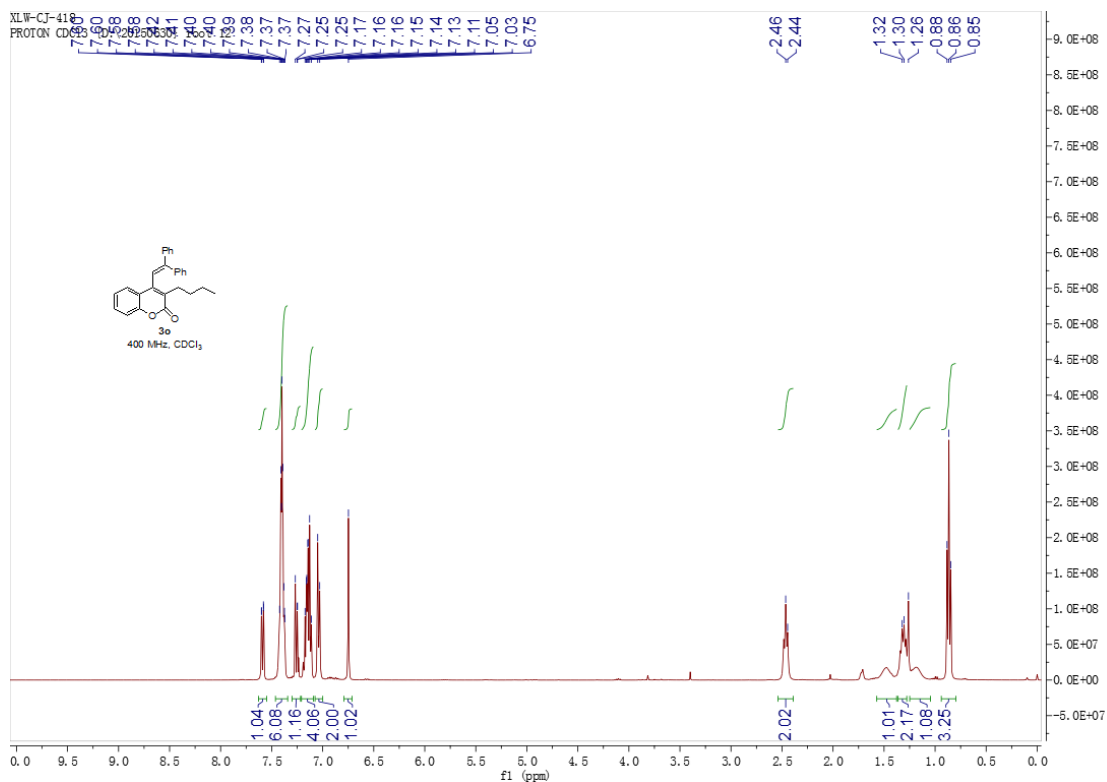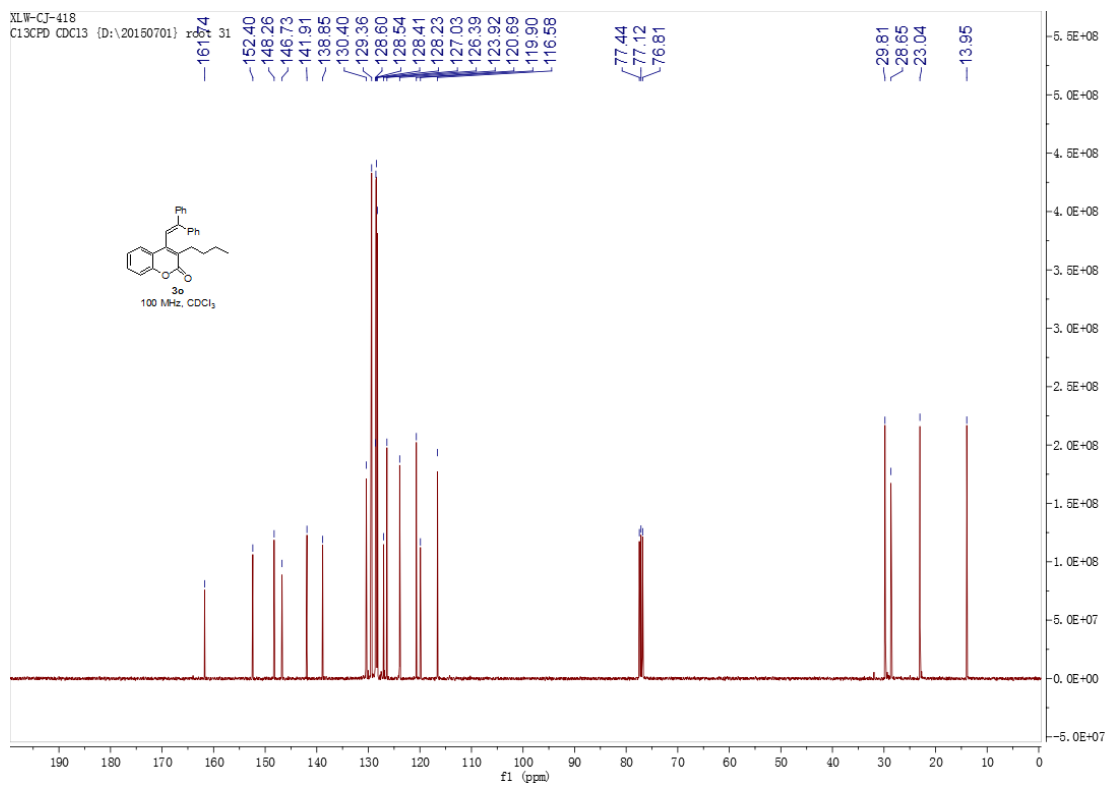

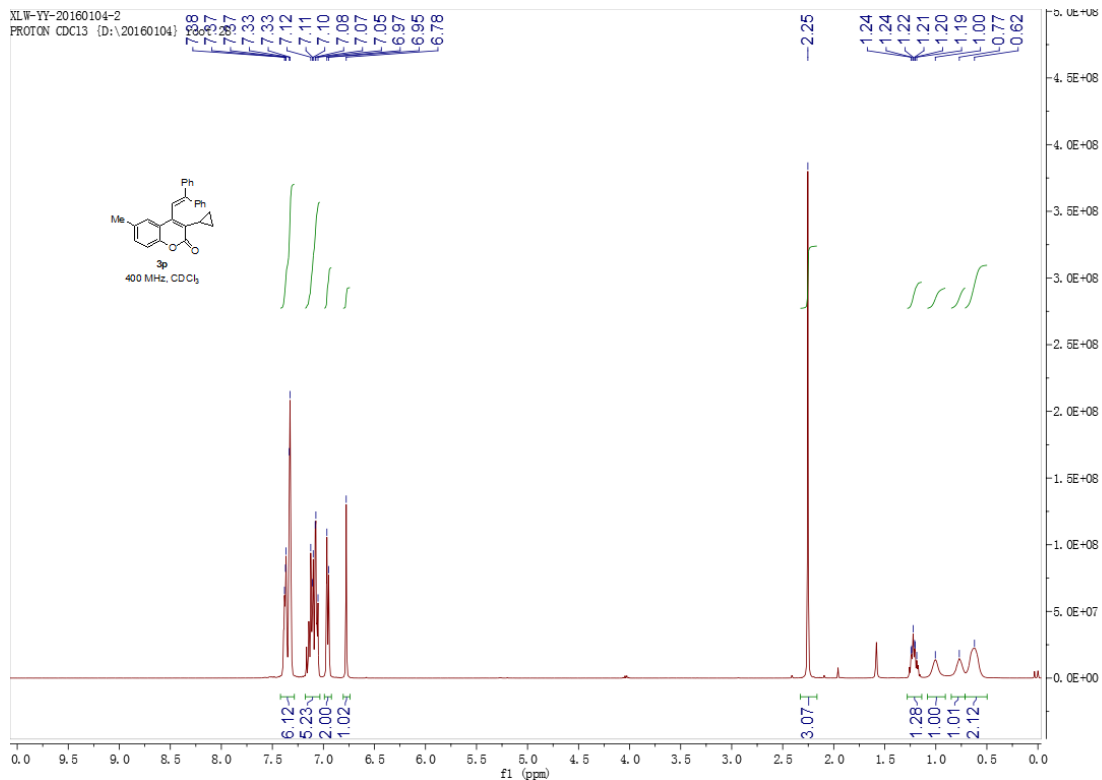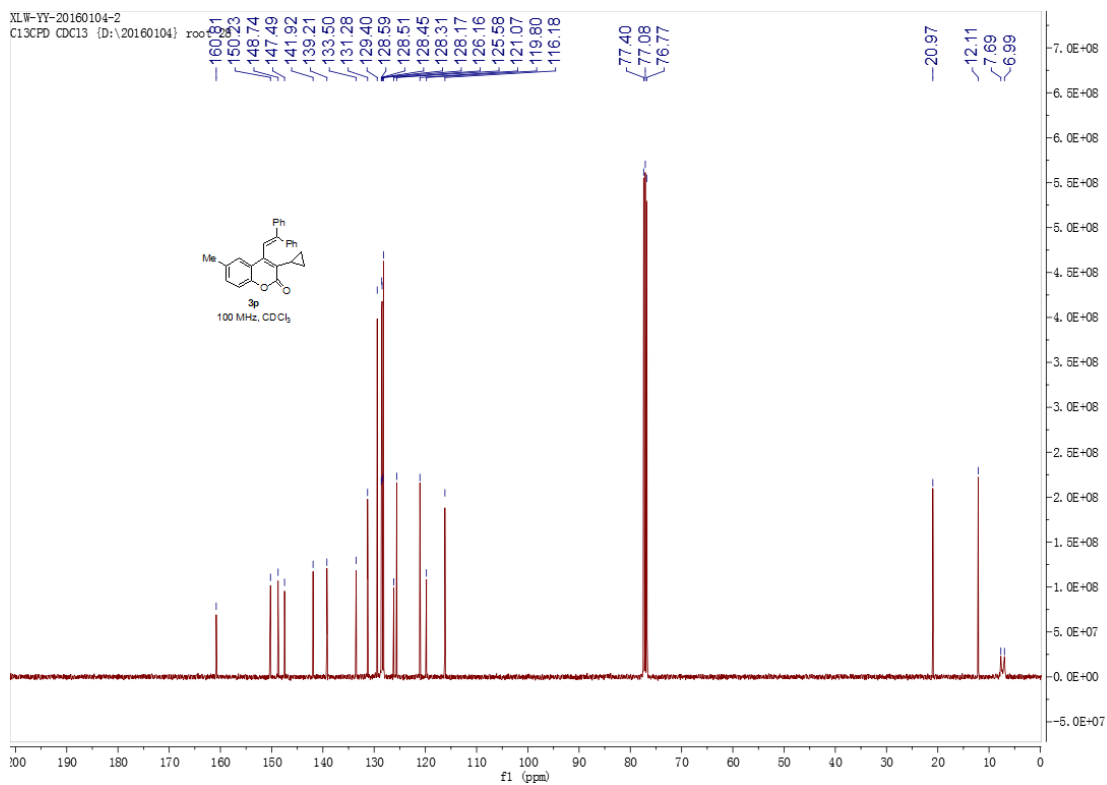

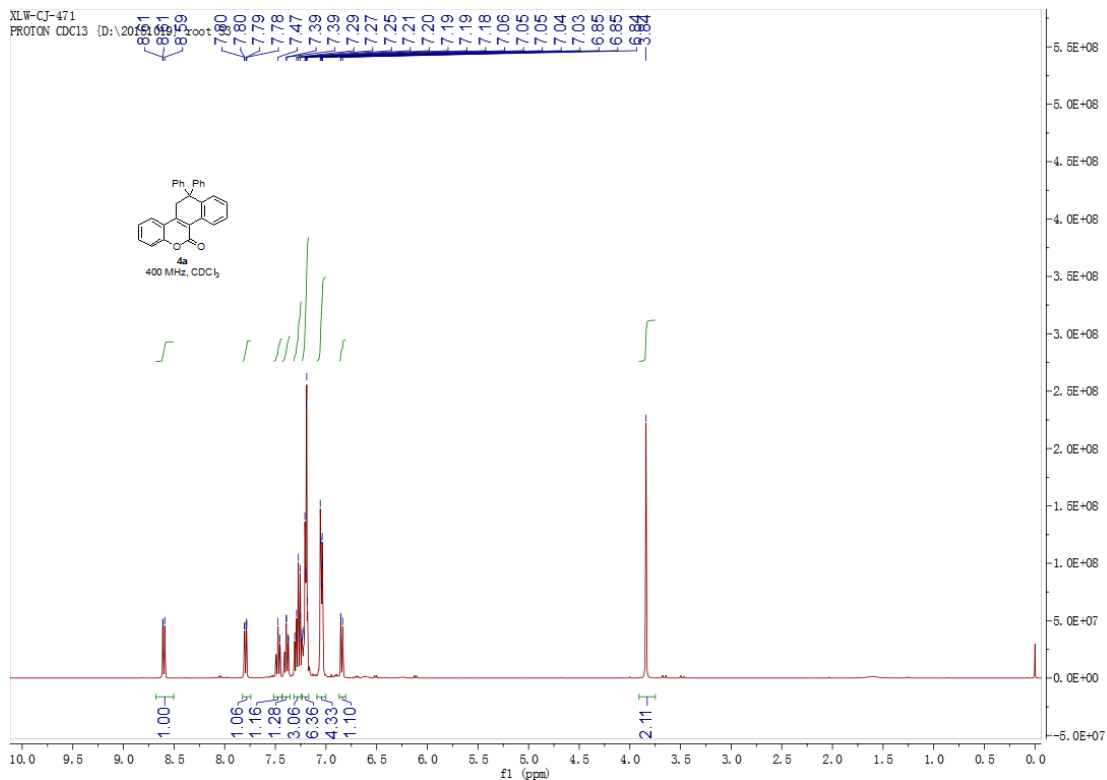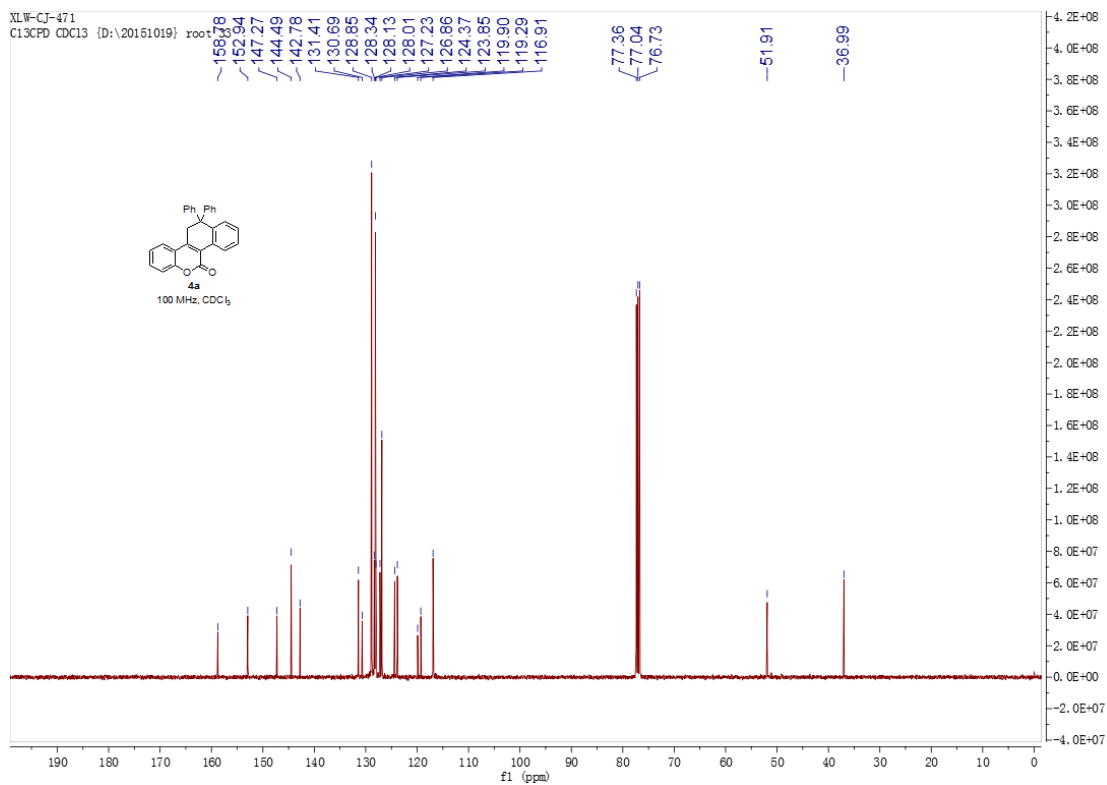

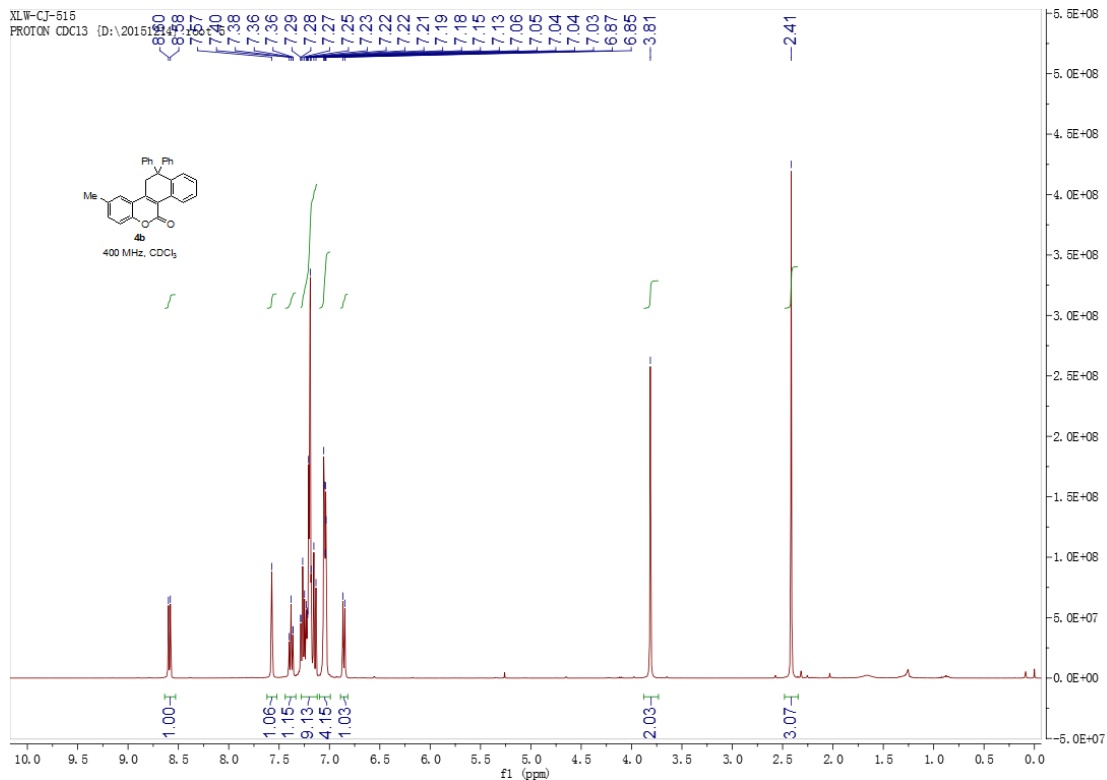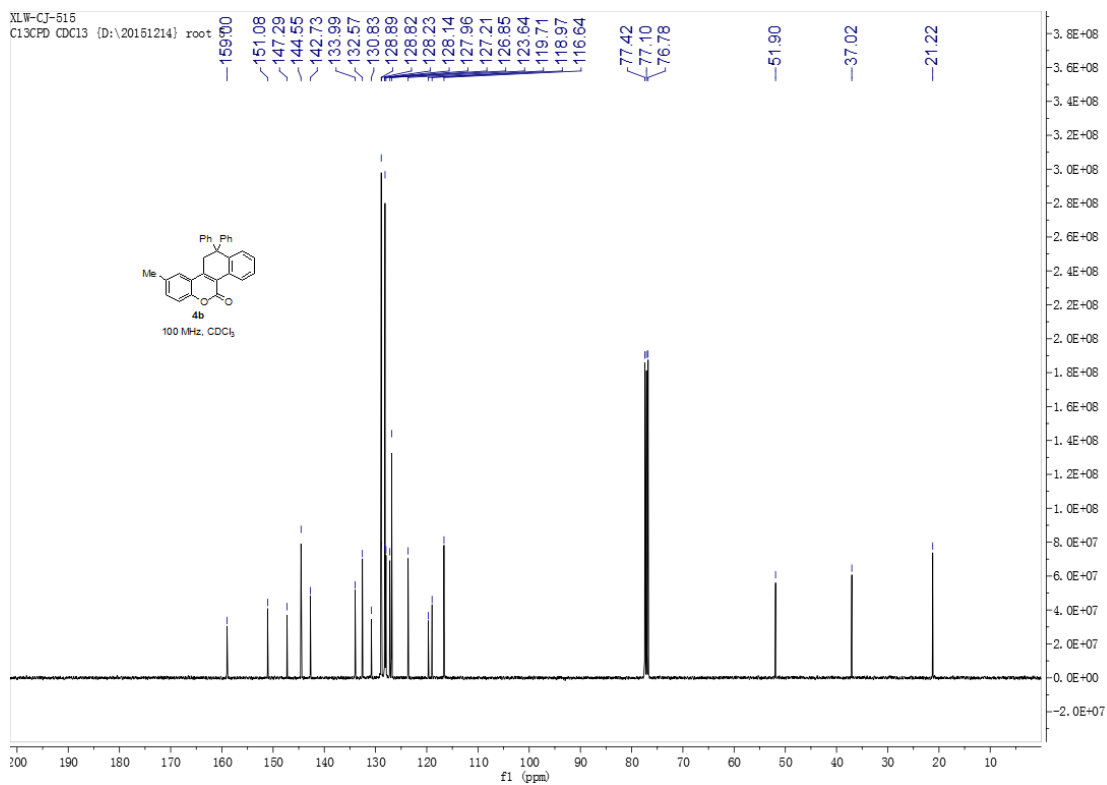



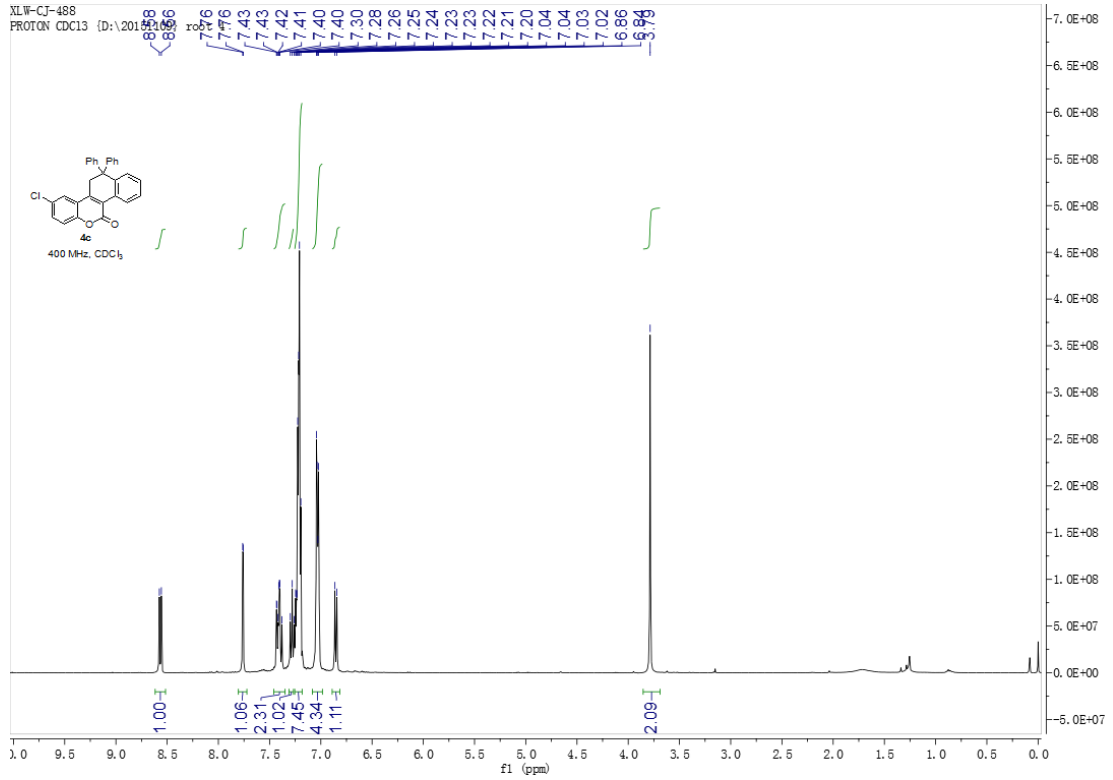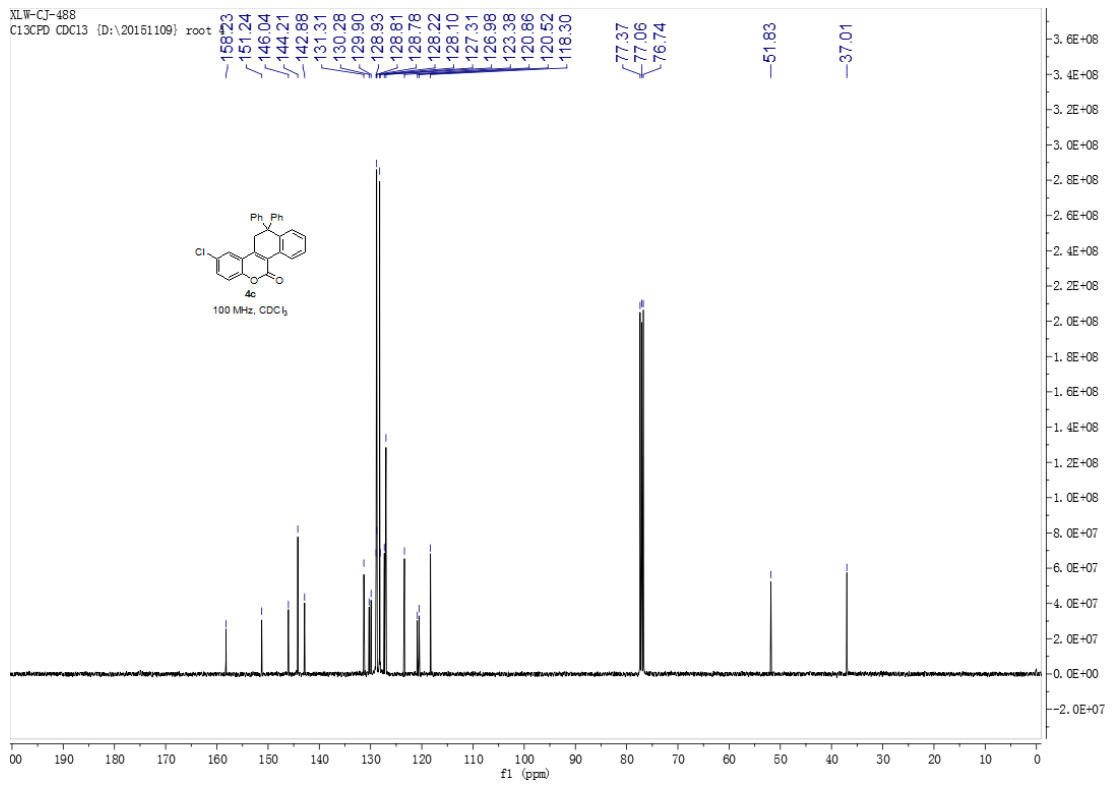

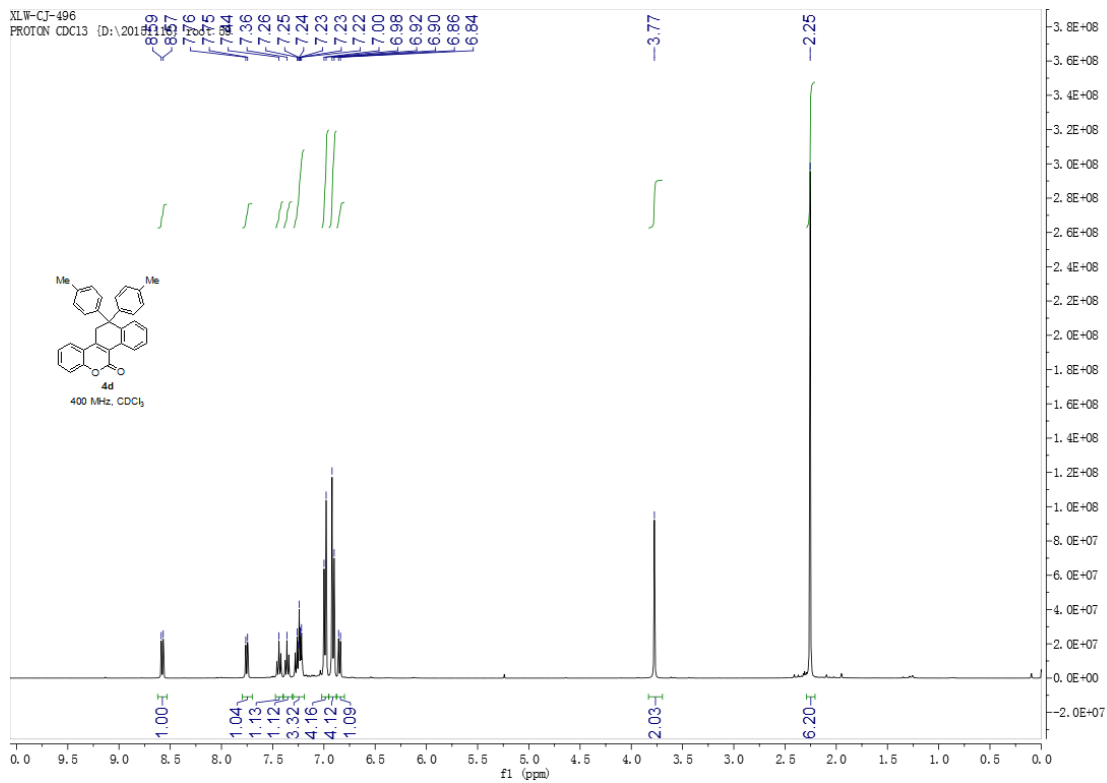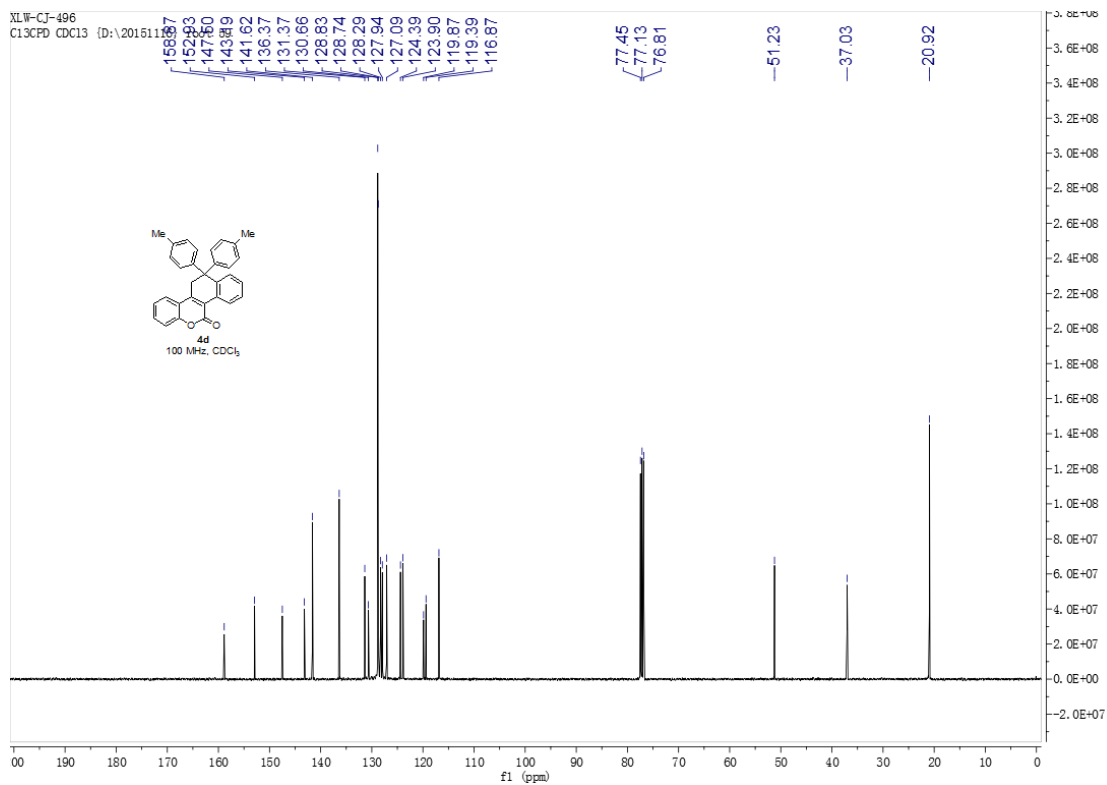

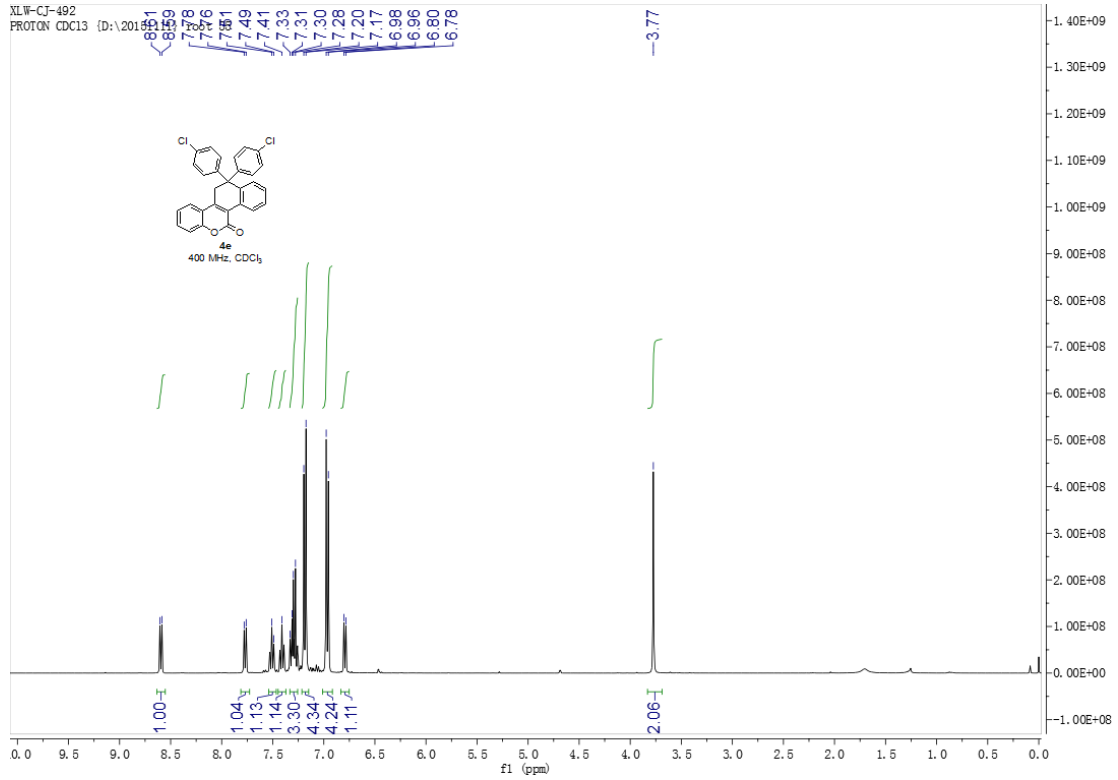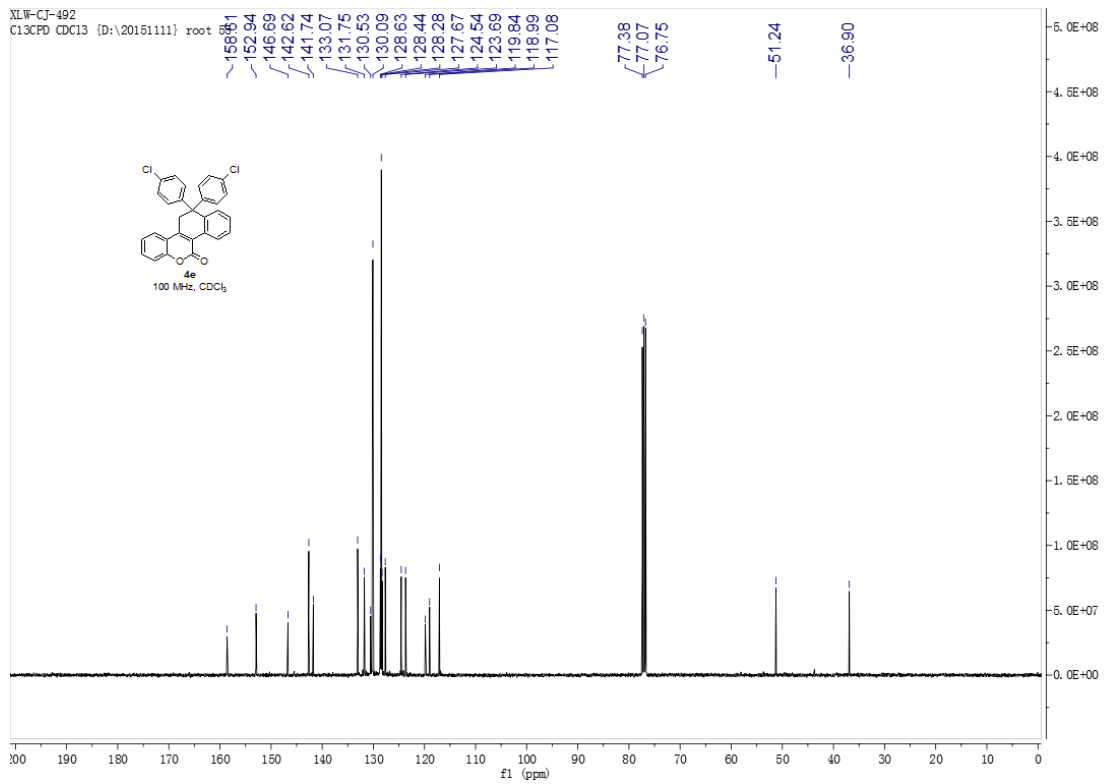

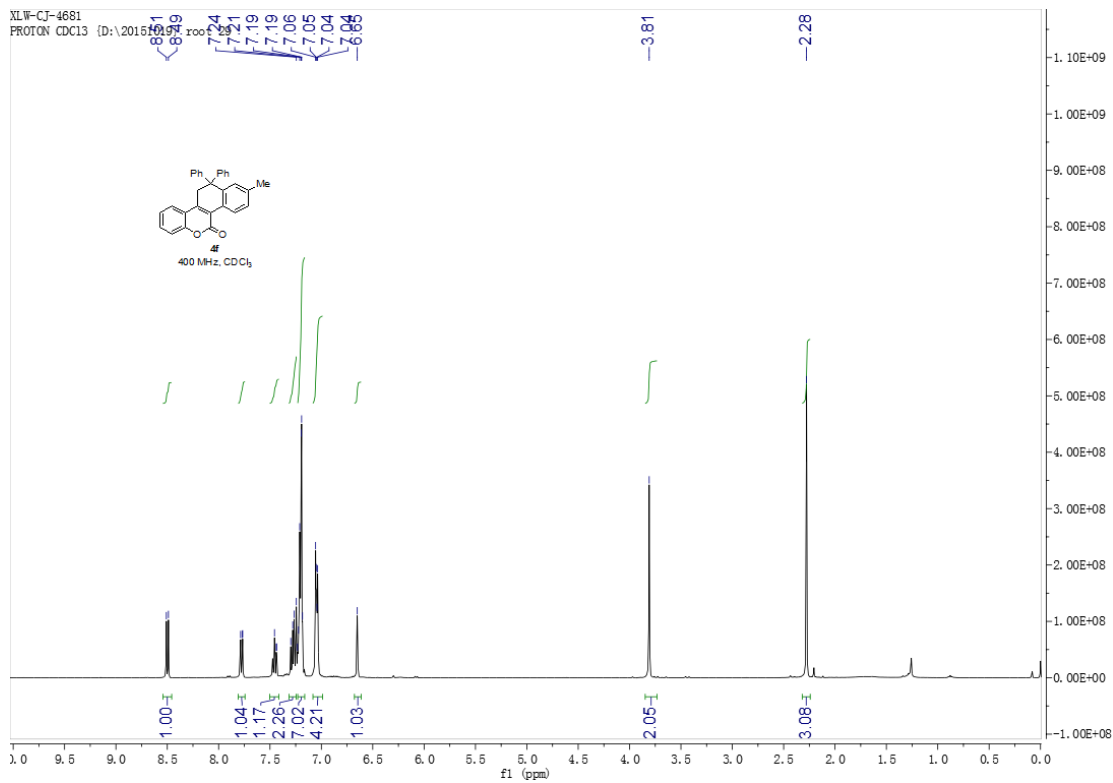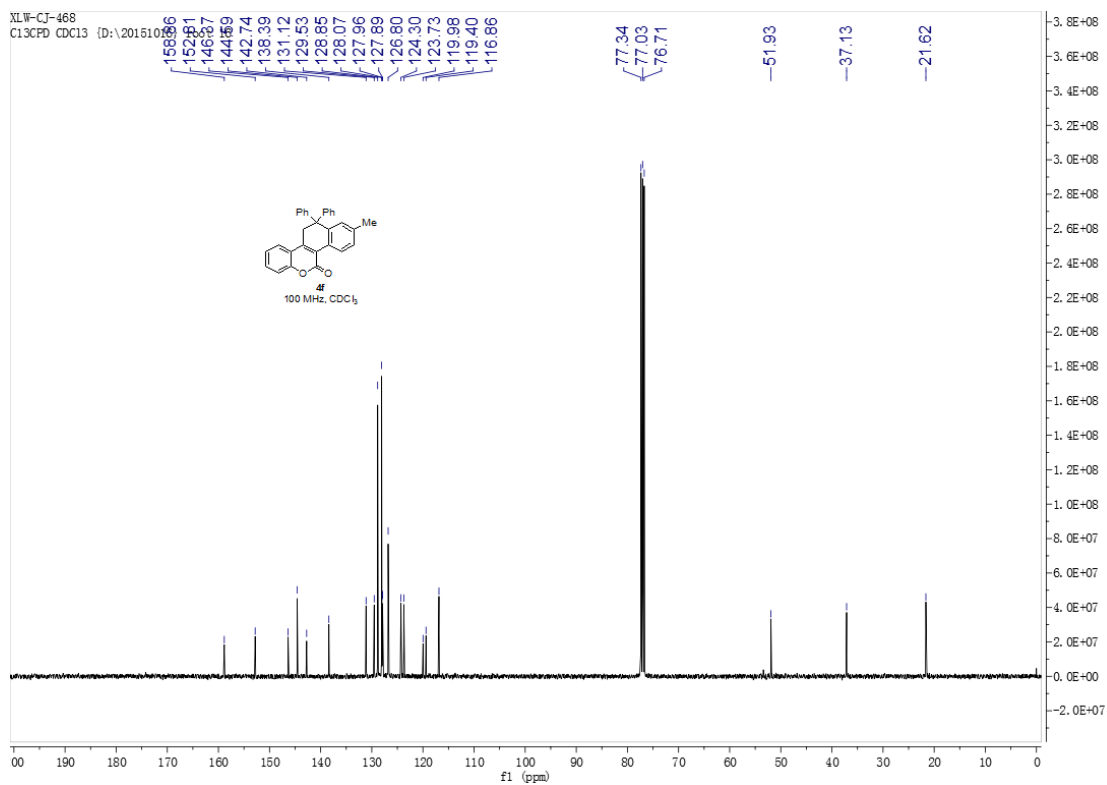

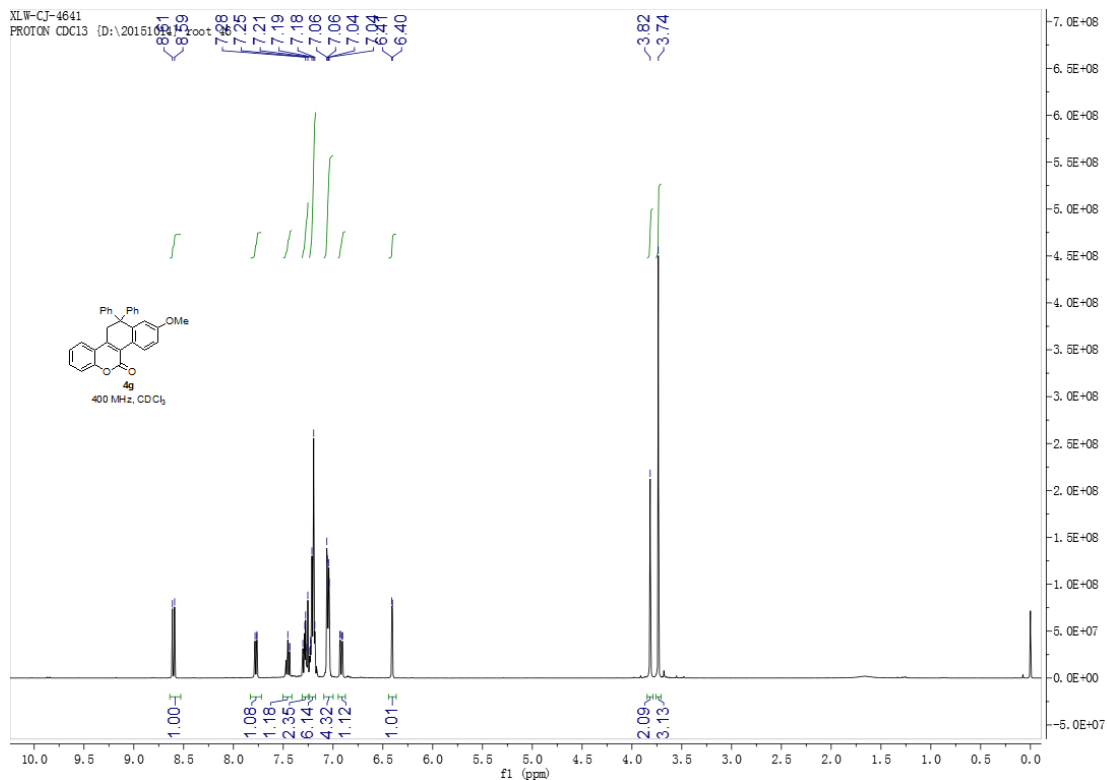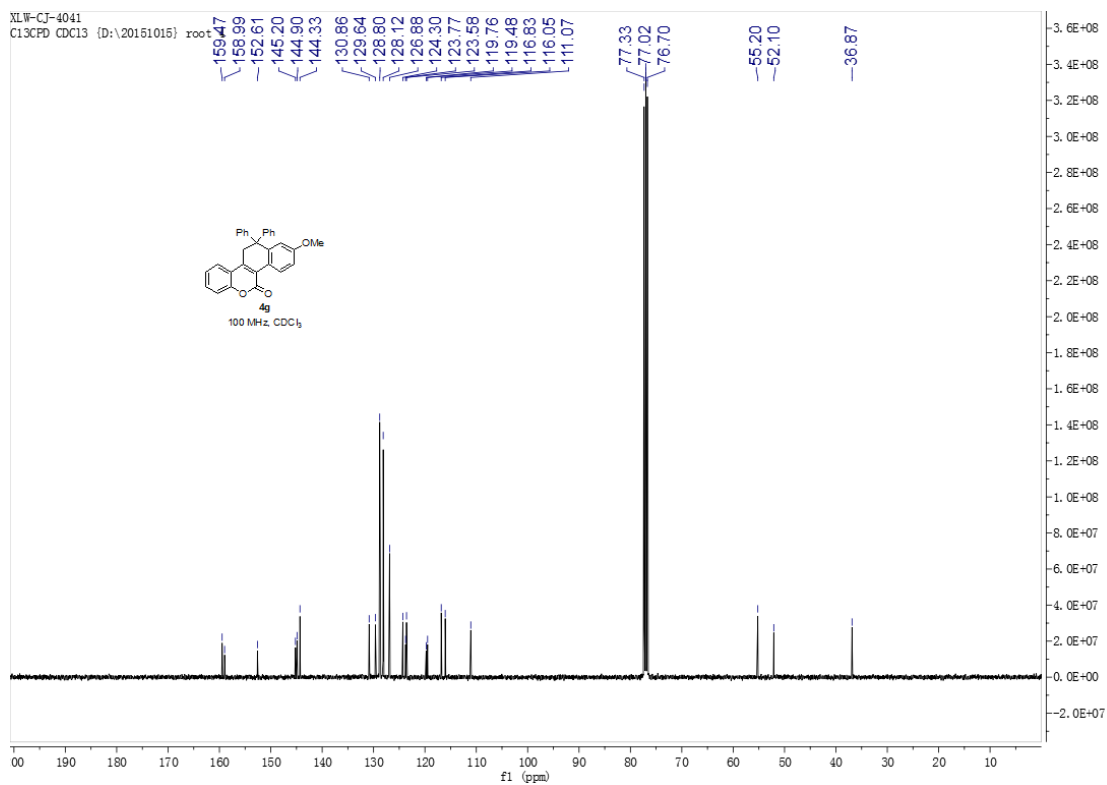

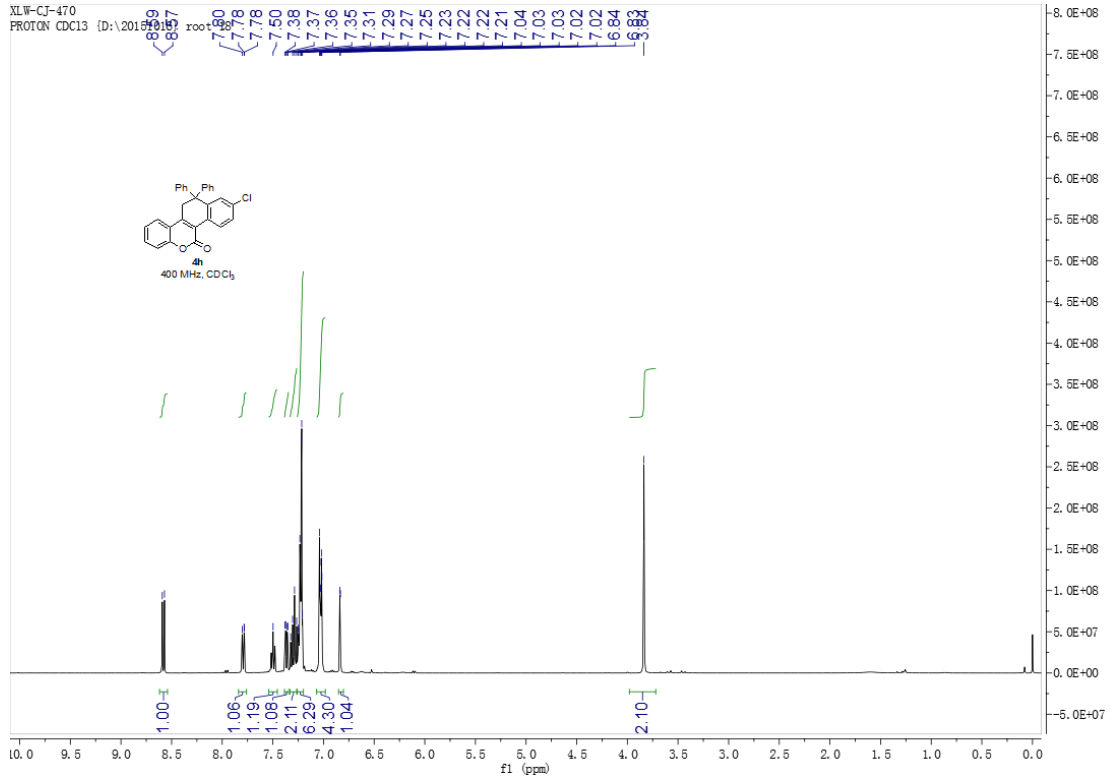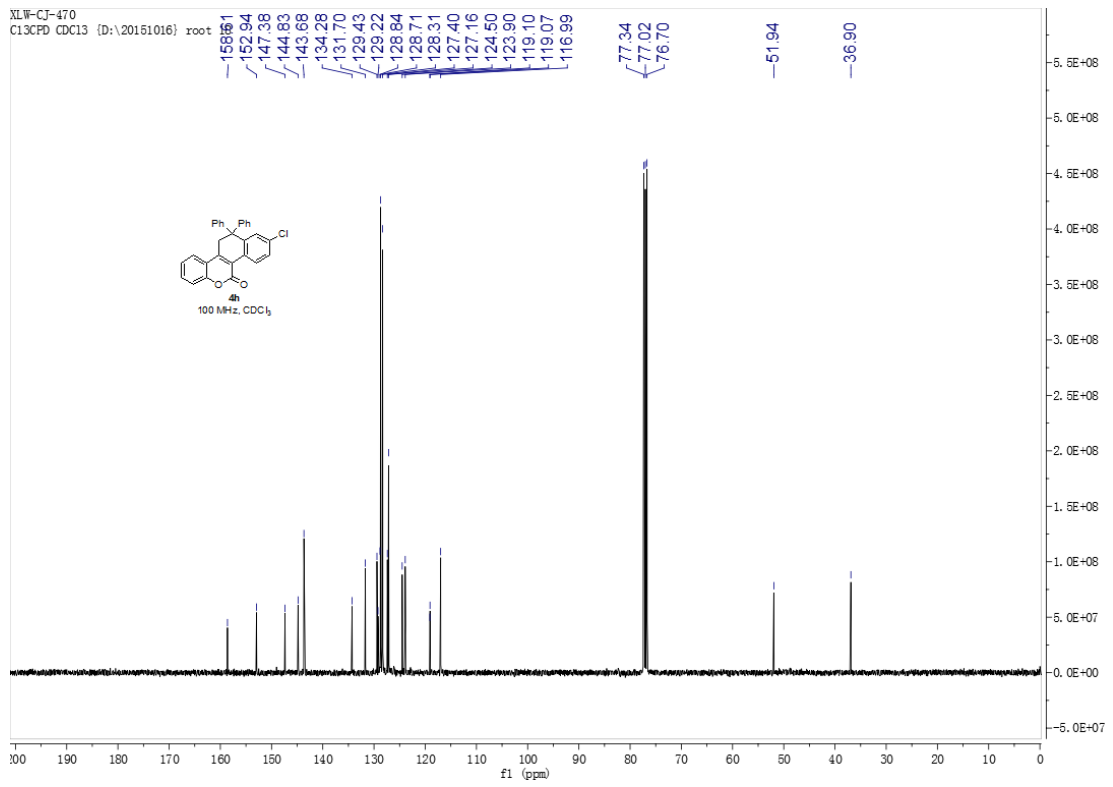

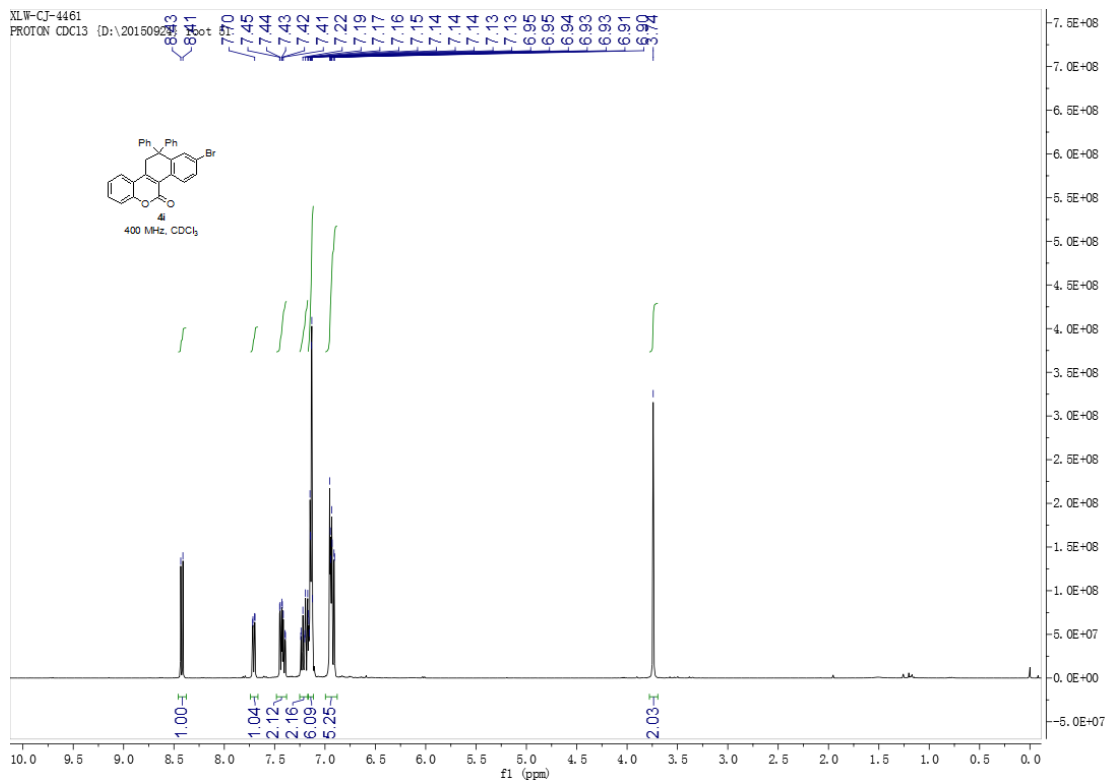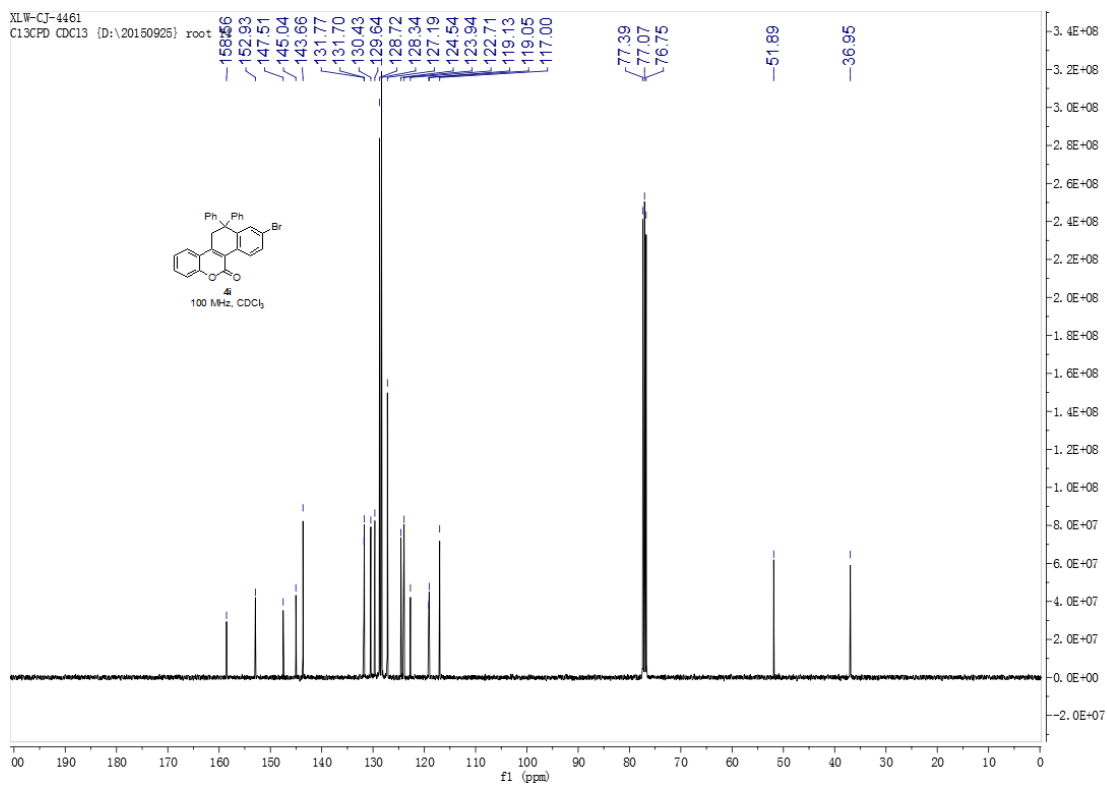

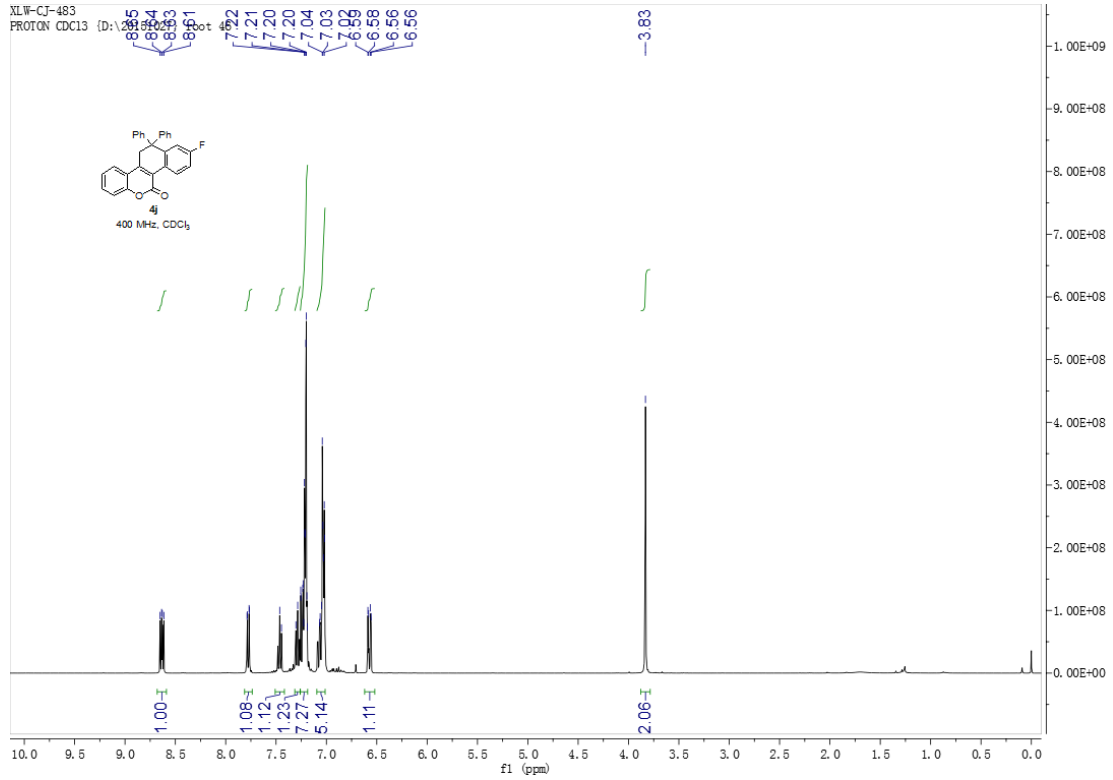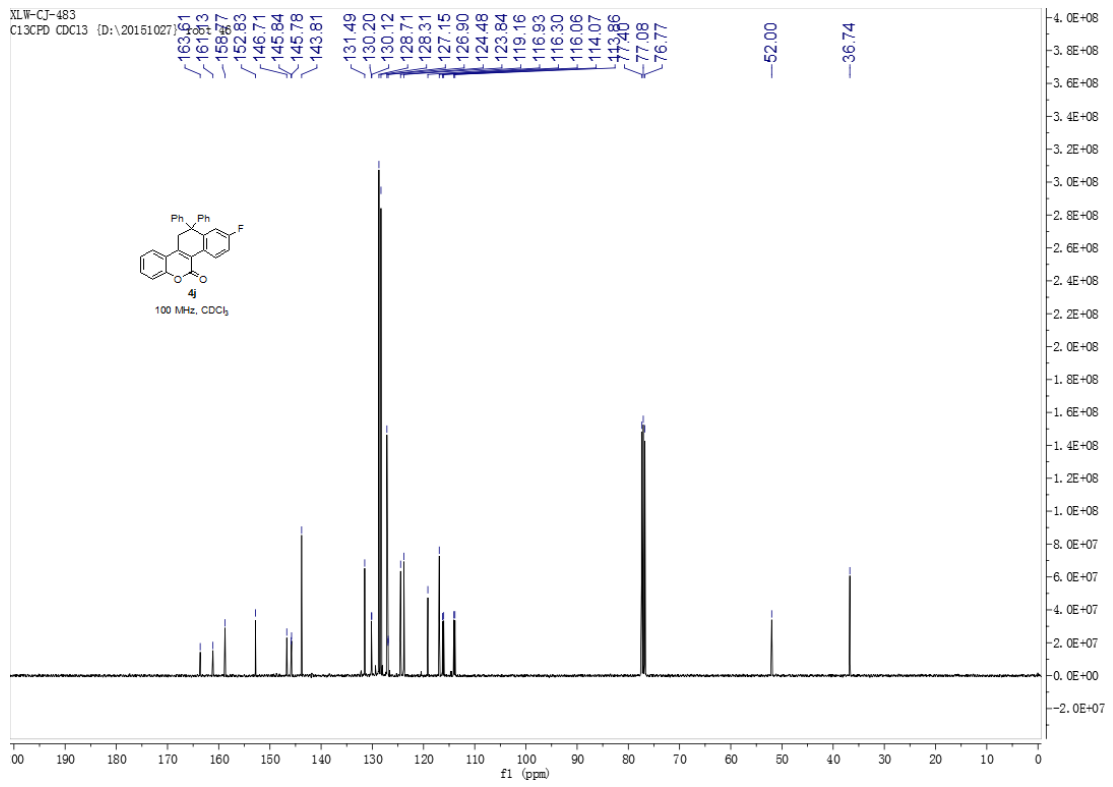



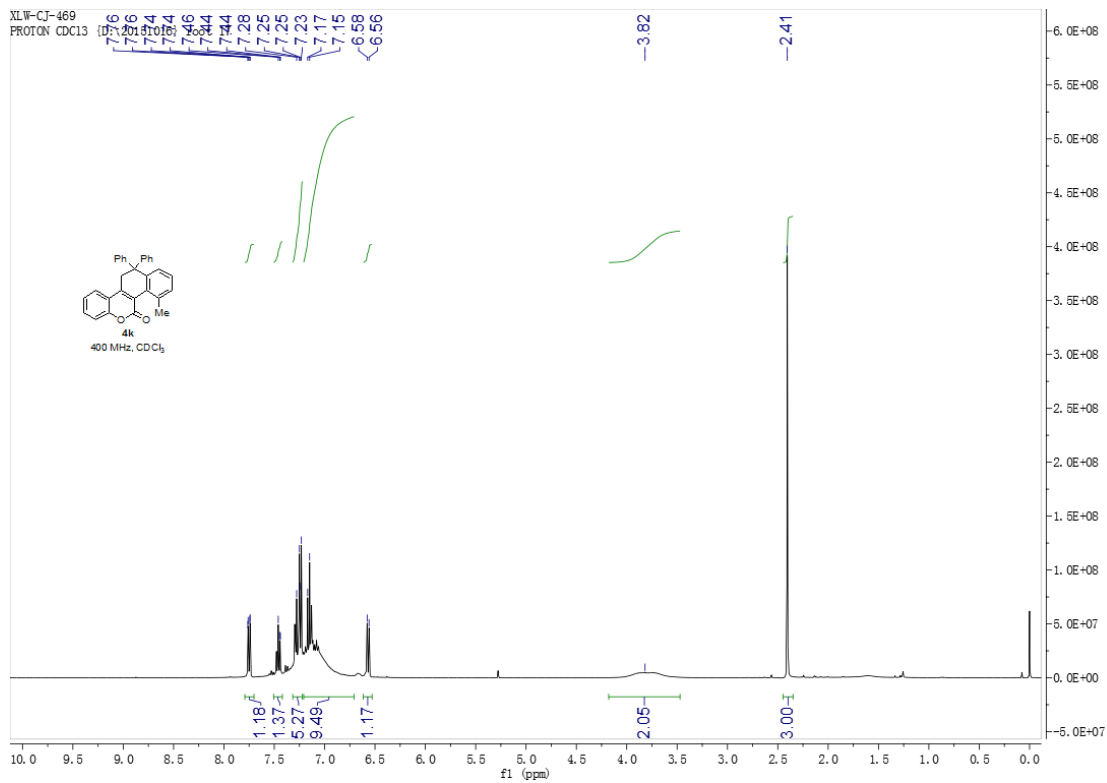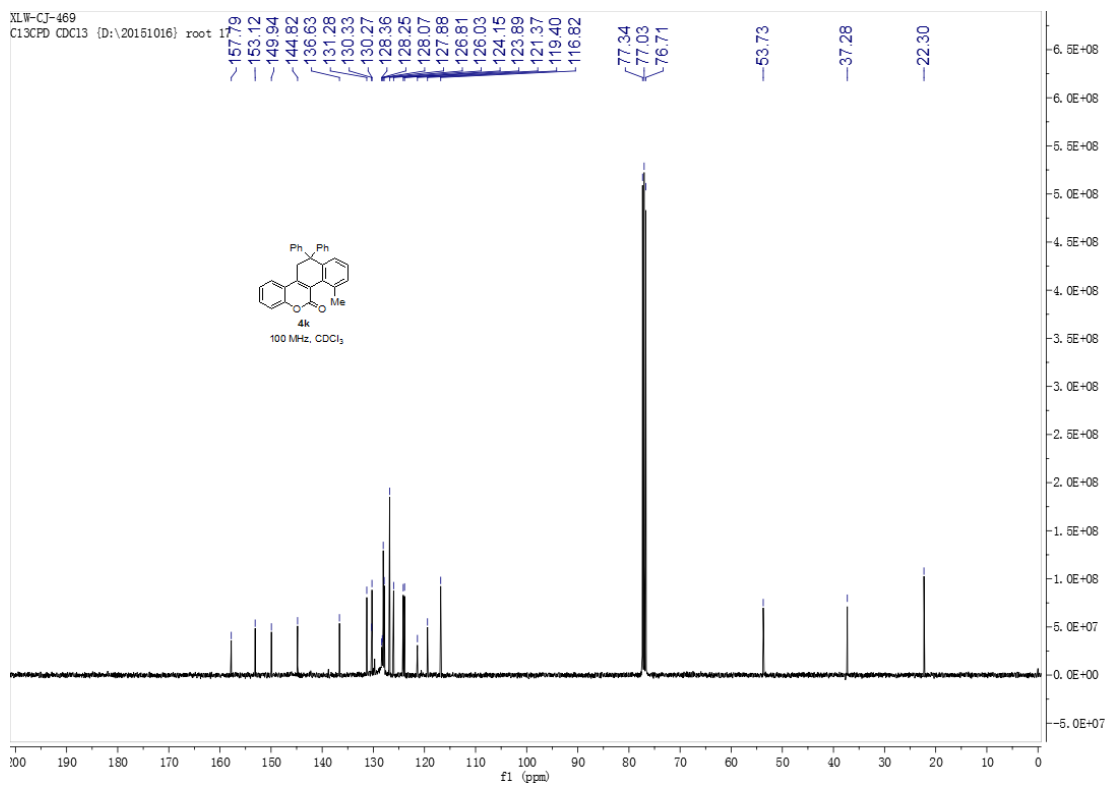

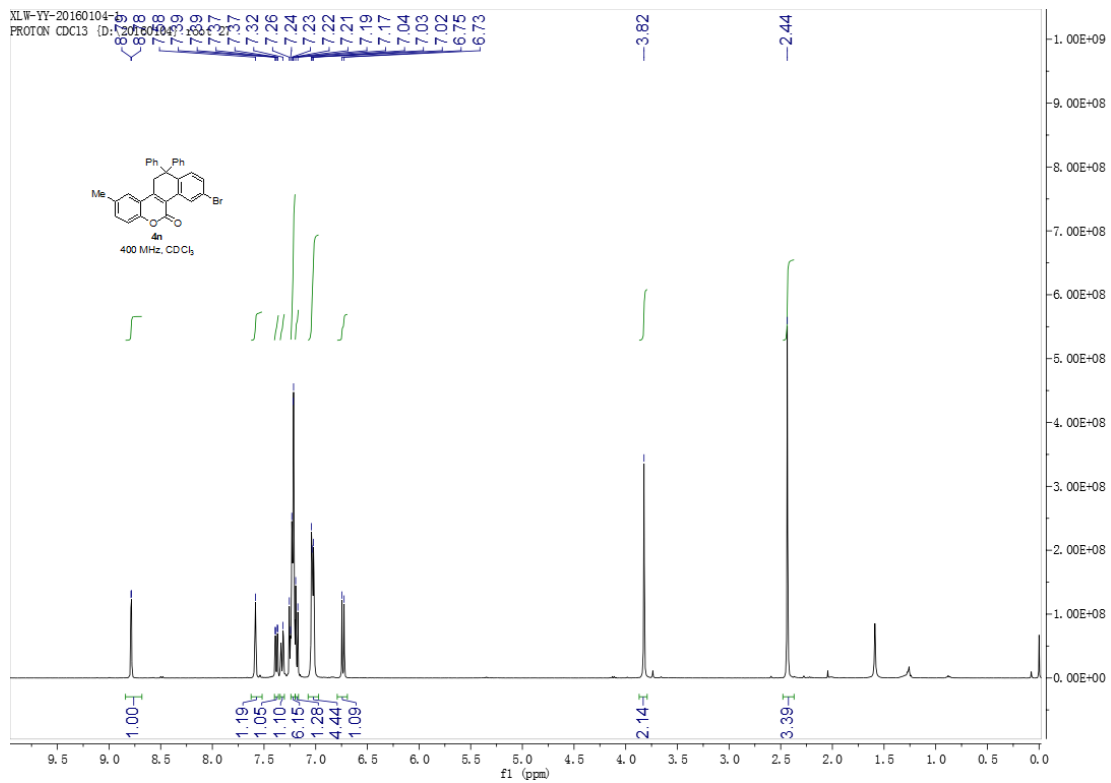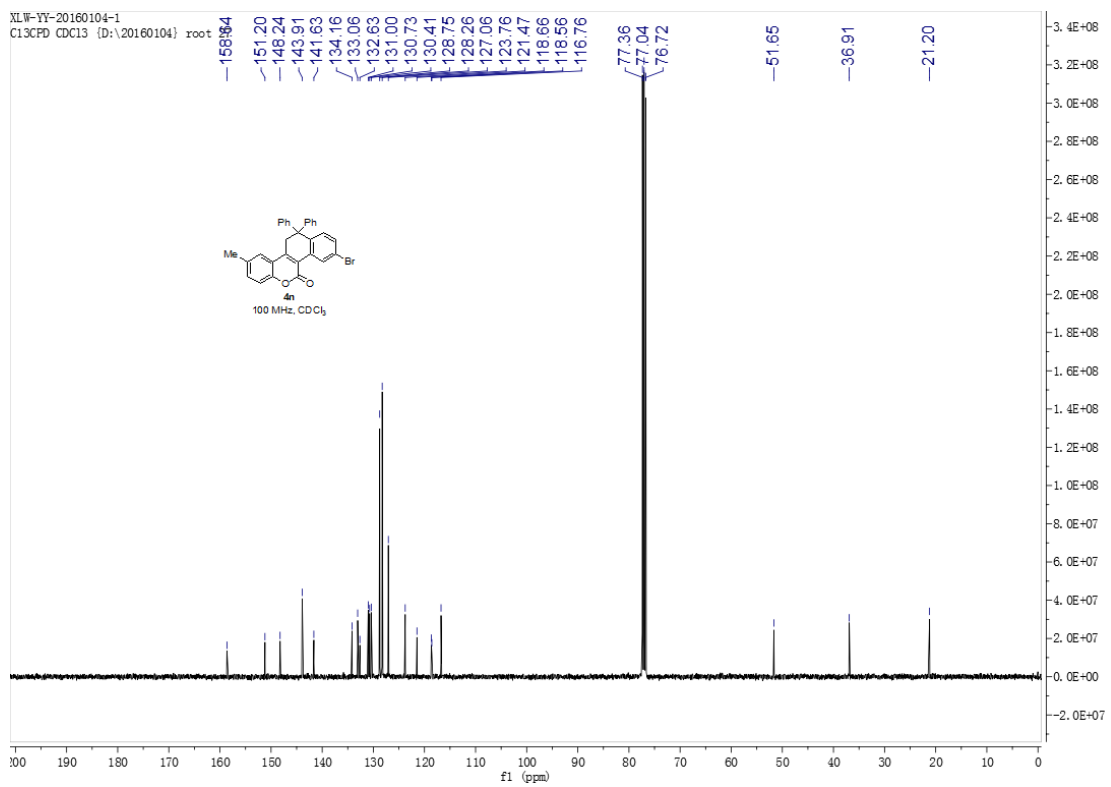

**Figure S1.** Fluorescent analysis of 4-vinylcoumarin **3a** in different solvents.

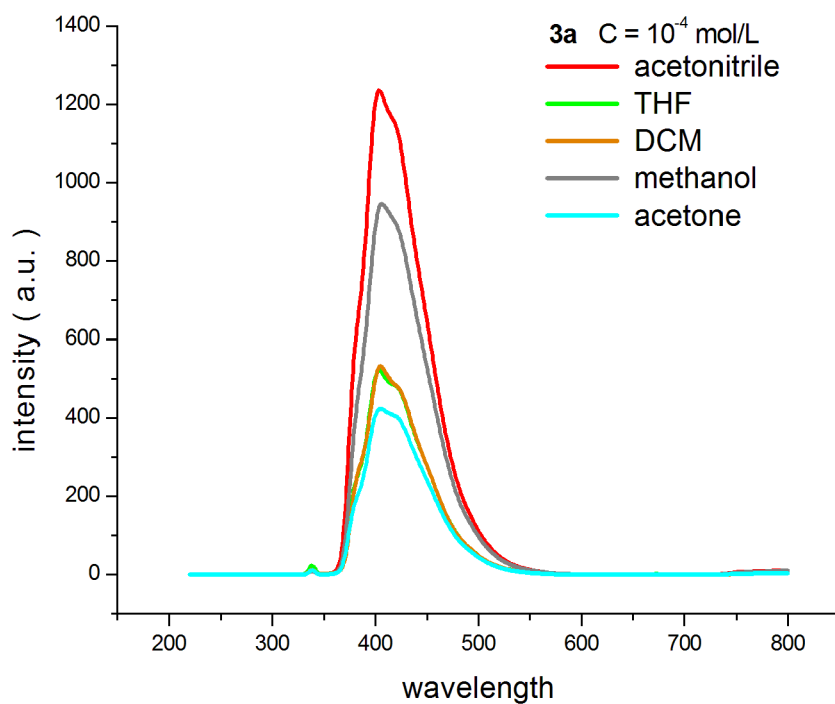

**Figure S2.** Fluorescent spectra of the solution of 4-vinylcoumarin **3a** in acetonitrile at different concentration.

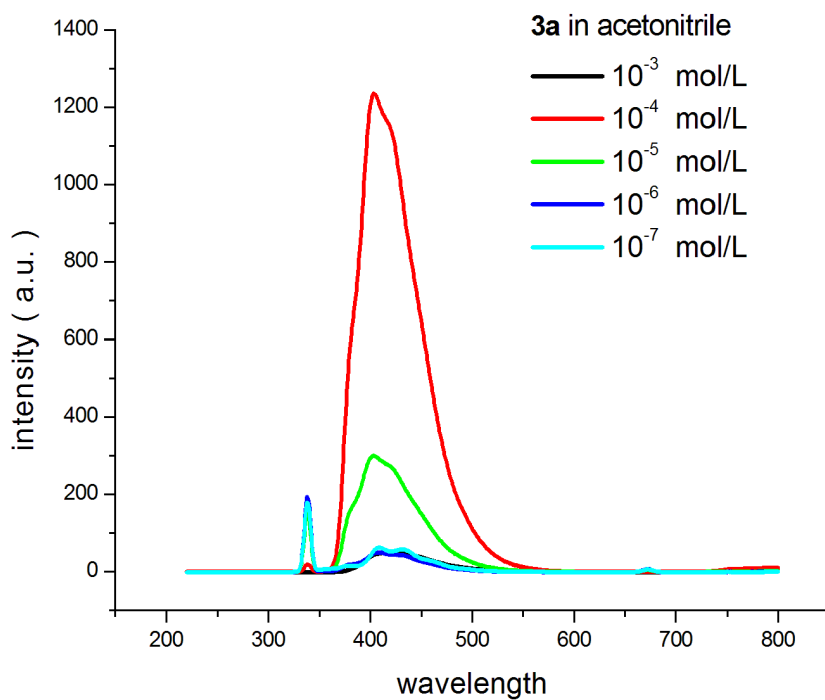

**Figure S3.** Fluorescent analysis of 4-vinylcoumarin **4a** in different solvents.

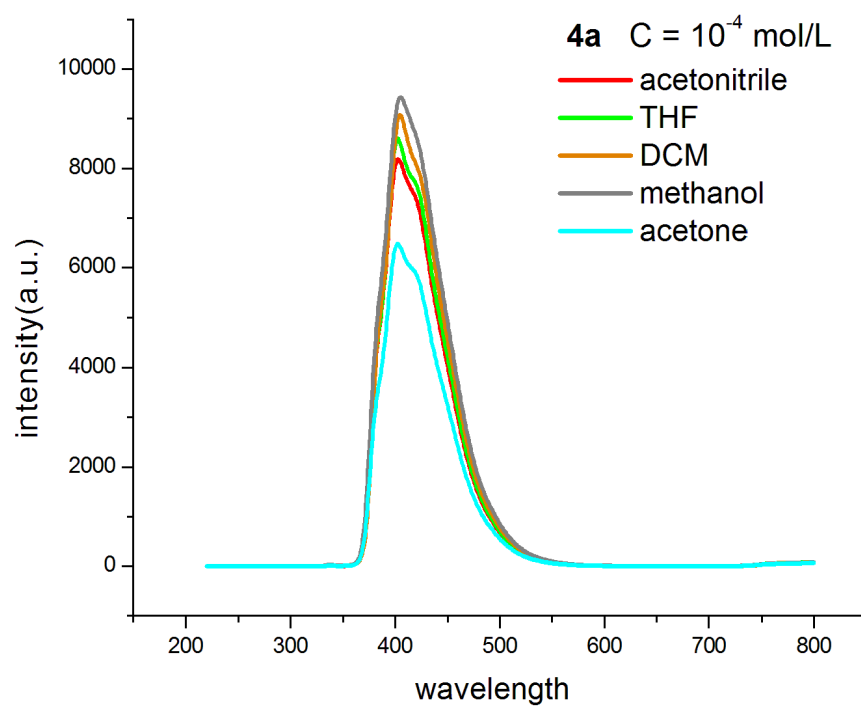

**Figure S4.** Fluorescent spectra of the solution of 4-vinylcoumarin **4a** in acetonitrile at different concentration.

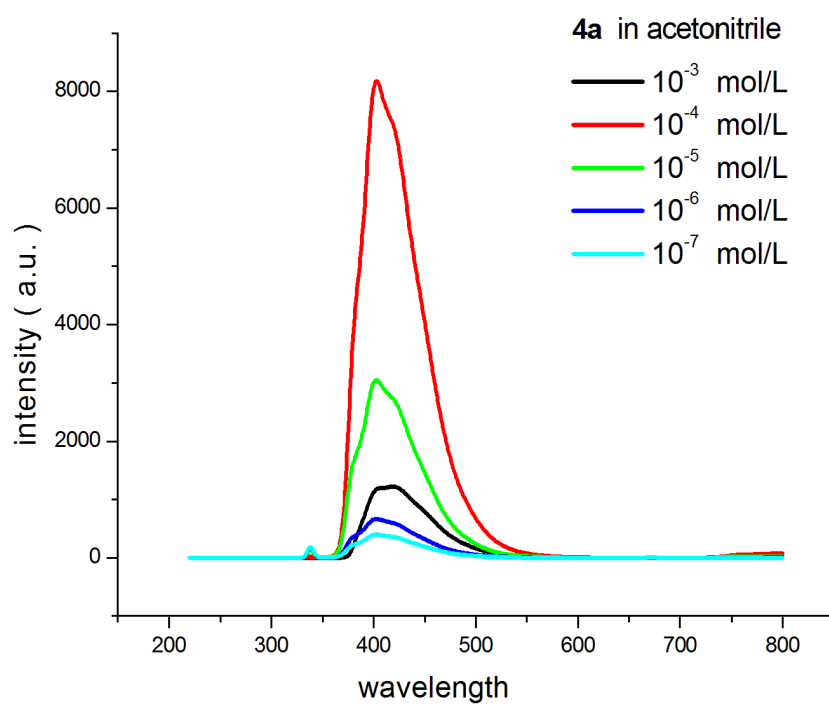

**Figure S5.** Fluorescent monitoring of transformations of 4-vinylcoumarin **3a** under UV irradiation.

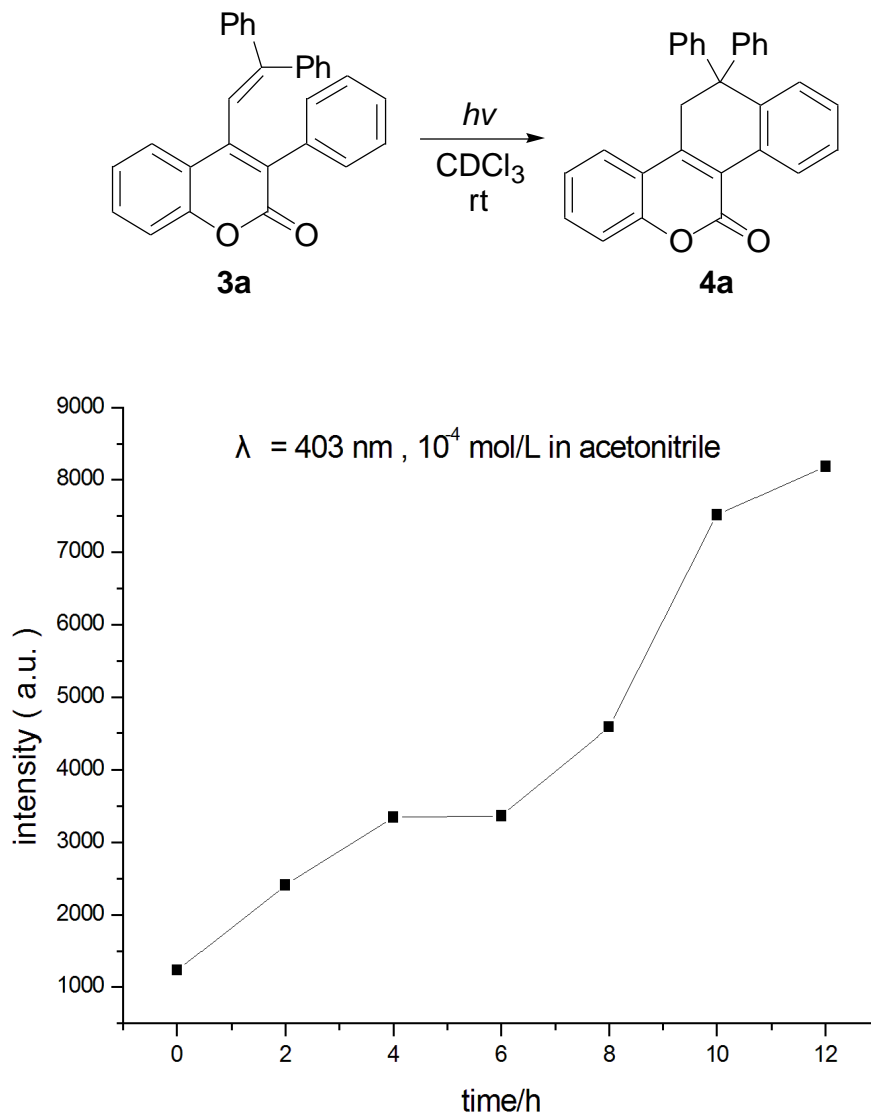

**Figure S6.** Frontier orbital energy (in eV) calculated at B3LYP/6-31G(d,p) level of theory

|                                                                                                 | HOMO(eV)                                                                                    | LUMO(eV)                                                                                     | $\Delta$ |
|-------------------------------------------------------------------------------------------------|---------------------------------------------------------------------------------------------|----------------------------------------------------------------------------------------------|----------|
| <b>3a</b><br>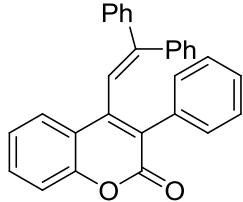  | -5.84<br>  | -1.92<br>  | 3.92     |
| <b>4a</b><br> | -5.80<br> | -2.03<br> | 3.77     |

**Note:** To obtain useful information for the better understanding of the observed fluorescence intensity of **3a** and **4a**, we performed the theoretical calculations using Gaussian 09 software package. Figure S5 gives the electron density diagrams for HOMO and LUMO orbitals of **3a** and **4a**. Interestingly, **3a** has the lower HOMO and the higher LUMO level (-5.84/-1.92 eV respectively), and **4a** has the higher HOMO and the lower LUMO level (-5.80/-2.03 eV respectively). By reference to **3a**, the reduced energy gap of **4a** predominantly derives from the decrease of LUMO level due to diminishing of conjugated 4-vinyl region. These calculation outcomes of frontier orbital energy reasonably account for the difference and spectra performance of **3a** and **4a**.

**References:** Frisch, M. J. et al. J. Gaussian 09, Revision C. 01. (Gaussian, Wallingford, 2010).

**Figure S7.** Crystal Structure of **4a**.

This crystal was deposited in the Cambridge Crystallographic Data Centre and assigned as CCDC 1490150. Further information can be found in the CIF file.

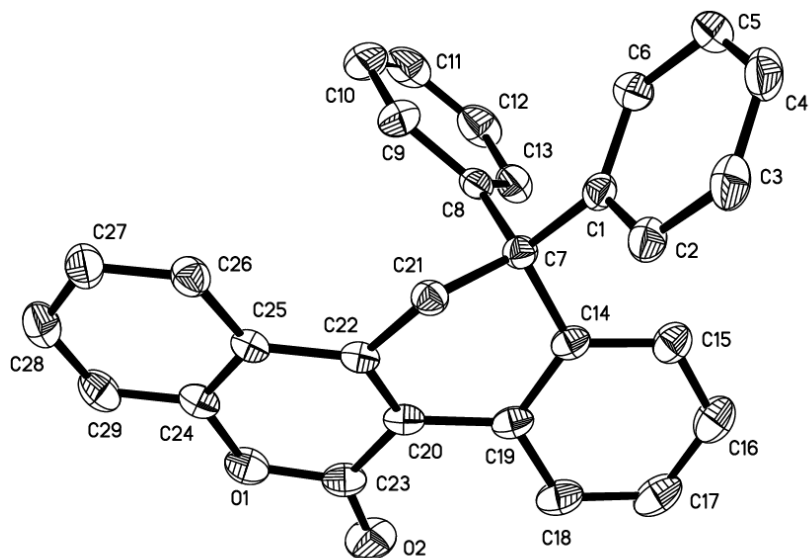

Supplement: c6cc05698a1.pdf [file c6cc05698a1.pdf]
